# Supplementary material for: Decellularized zebrafish cardiac extracellular matrix induces mammalian heart regeneration
Source: PubMed Central journal article supplement — Sci Adv. 2016 Nov 18;2(11):e1600844. doi: 10.1126/sciadv.1600844 (PMC5262469; doi:10.1126/sciadv.1600844), 2016-11-18
Supplement: 1600844_SM.pdf [file 1600844_SM.pdf]

## Supplementary Materials for **Decellularized zebrafish cardiac extracellular matrix induces mammalian heart regeneration**

William C. W. Chen, Zhouguang Wang, Maria Azzurra Missinato, Dae Woo Park, Daniel Ward Long,  
Heng-Jui Liu, Xuemei Zeng, Nathan A. Yates, Kang Kim, Yadong Wang

Published 18 November 2016, *Sci. Adv.* **2**, e1600844 (2016)  
DOI: 10.1126/sciadv.1600844

### **This PDF file includes:**

- Supplementary Materials and Methods
- fig. S1. Amputated zebrafish hearts and decellularization processes.
- fig. S2. Representative LV images of M- and B-mode echocardiography.
- fig. S3. Histological analysis of mouse hearts after zECM treatment.
- fig. S4. Fibrosis and chronic inflammation.
- fig. S5. Analysis of elastin within the infarct zone in zECM-treated hearts.
- fig. S6. Cardiomyocyte apoptosis.
- fig. S7. Cardiomyocyte proliferation at 6 weeks after MI.
- fig. S8. Echocardiographic analysis of cardiac function in control mice receiving myocardial saline injections and an intraperitoneal sham or DMSO injection with or without the ErbB2 inhibitor AG825 after AMI.
- fig. S9. c-kit<sup>+</sup> cells do not express mast cell marker tryptase.
- table S1. zECM Protein Identification Probability.
- table S2. mECM Protein Identification Probability.
- table S3. Summary of detected proteins in zECM and mECM.
- table S4. Echocardiographic parameters of infarcted mouse hearts following ECM treatment.
- table S5. Echocardiographic parameters of infarcted mouse hearts following ECM treatment and ErbB2 inhibitor administration.

## **SUPPLEMENTARY MATERIALS**

### **Supplementary Materials and Methods**

**Ventricular amputation and procurement of zebrafish hearts.** To obtain healing zebrafish hearts, ventricular resection surgeries were performed as described by Poss et al (15). Briefly, zebrafish were anesthetized in Tricaine (ethyl 3-aminobenzoate methanesulfonate, i.e. MS-222, tricaine methanesulfonate, A-5040; Sigma-Aldrich, St. Louis, MO, USA) and placed dorsally in a humid sponge. A small incision (scalpel 0.15mm, Fine Science Tools, Foster City, CA, USA) was made to expose the ventricle and approximately 20% of the ventricular apex was microscopically removed using iridectomy scissors (Fine Science Tools). After the surgery, fish were returned to water and stimulated to breathe with air bubbles. At 3 days post amputation (3 dpa), methylene blue (an anti-fungal/bacterial agent) was added to the fish tank 1 hr before harvesting. Amputated zebrafish and age-matched uninjured counterparts were lethally anesthetized with Tricaine. Zebrafish were then dipped 3 times in 70% ethanol immediately before harvesting. The whole hearts were extracted with sterile tools and placed on a sterile plate under the dissection microscope. To accentuate the regenerating ventricular apex, only two-thirds of the ventricle (including the apex) was collected for the decellularization. Normal zebrafish ventricles were collected in the same manner (only apical two-thirds). Tools were sterilized with 70% ethanol between each fish. Collected ventricles were immediately washed 3 times in 4% Penicillin/Streptomycin/Amphotericin-B with 1% Gentamycin (P/S/A/G) solution and transported back to the laboratory. Approximately 50 to 60 ventricles were pooled together per batch to obtain sufficient materials for decellularization. All ventricles were washed extensively in 4%, 2%, and 1% gradient P/S/A/G solutions (two times each) in the biosafety cabinet before being subjected to the decellularization process.

**Procurement of adult mouse ventricular tissues.** Mice were sacrificed, immersed in 70% ethanol for 30 seconds, and wiped clean before removing hearts with two sets of sterile tools (one set for cutting the skin and opening the chest and another set for removing the heart). Collected hearts were immediately washed 3 times in 4% P/S/A/G solution and transported back to the laboratory. Left ventricles were then dissected out and finely chopped to  $<1 \text{ mm}^3$  with sterile tools in the biosafety cabinet. All mouse ventricular pieces were washed extensively in 4%, 2%, and 1% gradient P/S/A/G solutions (two times each) before being subjected to the decellularization process.

**Decellularization of cardiac ECM.** Zebrafish ventricles and mouse ventricular pieces were carefully transferred to individually weighed, sterile 1.5 ml microcentrifuge tubes containing 1 ml 1% P/S/A/G solution. Tubes were centrifuged at 6,000 g for 3 minutes with careful removal of supernatants and then individually weighed to obtain the collective wet weights of samples. Tubes were subsequently replenished with 1 ml 1% P/S/A/G solution, vortexed to evenly distribute contents, parafilmed to seal

caps, and subjected to three freeze-thaw cycles by submerging in liquid nitrogen for 10 minutes and then completely thawing at 37°C in water bath. Alternatively tubes can be chilled with dry ice for at least 30 minutes or at -80°C for at least 1 hour per cycle before being completely thawed at 37°C in water bath. Tubes were centrifuged at 6,000 g for 3 minutes with careful removal of supernatants and replenished with 1 ml 1% P/S/A/G solution between each freeze-thaw cycle and then vortexed to ensure even distribution of contents before starting the next cycle. After three cycles, erythrocyte lysis was performed twice by adding 1 ml erythrolysis buffer (ELB) to resuspend contents, incubating for 20-30 minutes at room temperature, and centrifuging at 6,000 g for 3 minutes. Samples were then subjected to two more freeze-thaw cycles as described above with 1 ml 1% P/S/A/G solution. Samples were subsequently incubated with 250 U/ml deoxyribonuclease I (DNase I, 18047-019) and 25 U/ml ribonuclease A (RNase A, AM2274) at 37 °C for at least 1 hour (both from Life Technologies, Grand Island, NY, USA). Treatment with DNase I and RNase A was repeated after centrifugation at 6,000 g for 3 minutes and careful removal of the supernatant. After 2 rounds of DNA/RNA lysis, samples were washed three times with sterile 0.9% normal saline (Baxter Healthcare, Deerfield, IL, USA) and frozen at -80°C for 1 hour. Samples were then washed with 0.9% normal saline, centrifuged at 6,000 g for 3 minutes with complete removal of supernatants, and subjected to lyophilization for 72 hours in original tubes in a sterilized chamber. Immediately after lyophilization, tubes were individually weighed to obtain the collective dry weights of lyophilized products. Lyophilized samples were finely crushed and ground for 15-20 minutes into fine powders in original tubes placed in a liquid nitrogen-cooled mini mortar (H37260-0100; Bel-Art Products, Wayne, NJ, USA). Lyophilized powders were stored at -80°C for future use.

**Preparation of cardiac ECM suspension and particle size measurement.** Prior to applications, lyophilized cardiac ECM powders were weighed in a sterile container, resuspended in 0.9% normal saline, and sonicated in cool water for 15 min. Large particles were then removed by centrifugation at 300 × g. Cardiac ECM suspension was collected for immediate use or stored on dry ice for later use. Cardiac ECM particle size was measured by Zetasizer Nano ZS90 (Malvern, Worcestershire, UK) and reported as the mean from 25 measurements. Results were then averaged from measurements of three independent samples. For in vivo administration, 0.5 mg of lyophilized zECM or mECM powders was resuspended in 30 µl of 0.9% normal saline, sonicated and centrifuged as described above, and transported on dry ice to the operating room prior to the administration.

**Myocardial infarction model.** The induction of myocardial infarction (MI) and intramyocardial injections have been performed as we previously reported (59, 60). In brief, after the induction of anesthesia with 4% isoflurane gas, mice were intubated and inhalationally anesthetized with 2% isoflurane gas throughout the surgery. MI was microscopically induced by permanent ligation of the left anterior descending coronary artery (LAD). Mice were then randomly assigned to one of the four

groups: hzECM, nzECM, mECM, or saline control. Five minutes after the induction of infarction, 30  $\mu$ l of zECM or mECM suspension was injected at three sites of the ischemic myocardium (center and two borders of the infarct; 10  $\mu$ l for each site). Control mice received injections of 30  $\mu$ l normal saline. The investigator who induced MI and performed injections was blinded to the content of the injectant. For ErbB2 inhibition in vivo, the ErbB2 inhibitor AG825 (sc-202045A; Santa Cruz Biotechnology, Dallas, TX, USA) was dissolved in dimethyl sulfoxide (DMSO) and intraperitoneally injected once at 5 mg/kg (20 to 25  $\mu$ l in volume) immediately after the cardiac ECM administration (40, 41). Control mice received a sham injection or an intraperitoneal injection of 25  $\mu$ l DMSO alone.

**Echocardiography.** Echocardiographic studies were performed by a blinded investigator repeatedly before surgery and at 5 days, 2 weeks, and 6 weeks after surgery to assess the cardiac function, as we previously described (60, 61). Briefly, mice were initially anesthetized with 2% isoflurane gas and subsequently maintained at 1-1.5% isoflurane gas throughout the echocardiographic study. Mice were then immobilized on a heated stage equipped with electrocardiography. Heart rate and respiratory rate were continuously monitored. The body temperature was maintained at 37°C. Echocardiographic parameters were measured using a high-frequency linear probe (MS400, 30 MHz) connected to a high-resolution ultrasound imaging system (Vevo 2100; FUJIFILM VisualSonics, Toronto, Ontario, Canada). M- and B-mode frames were acquired at a frame rate of 235 Hz during each scan. At least three independent M- and B-mode scans (300 frames per scan) were recorded respectively for each animal at each time point. End-systolic dimension (ESD) and end-diastolic dimensions (EDD) were determined from short axis images of the left ventricle using M-mode scan. Ten consecutive beats were measured from M-mode frames. Results were averaged. End-systolic area (ESA) and end-diastolic area (EDA) were measured from short-axis images of the LV using B-mode scan (minimum and maximum LV chamber area respectively). Functional parameters, including the LV fractional shortening (LVFS), LV fractional area change (LVFAC), and LV ejection fraction (LVEF), were determined as previously described (62, 63). Mice that died, displayed morphological/behavioral abnormality, or were sacrificed for histological analysis before 6 weeks post-injection were not included in echocardiographic studies.

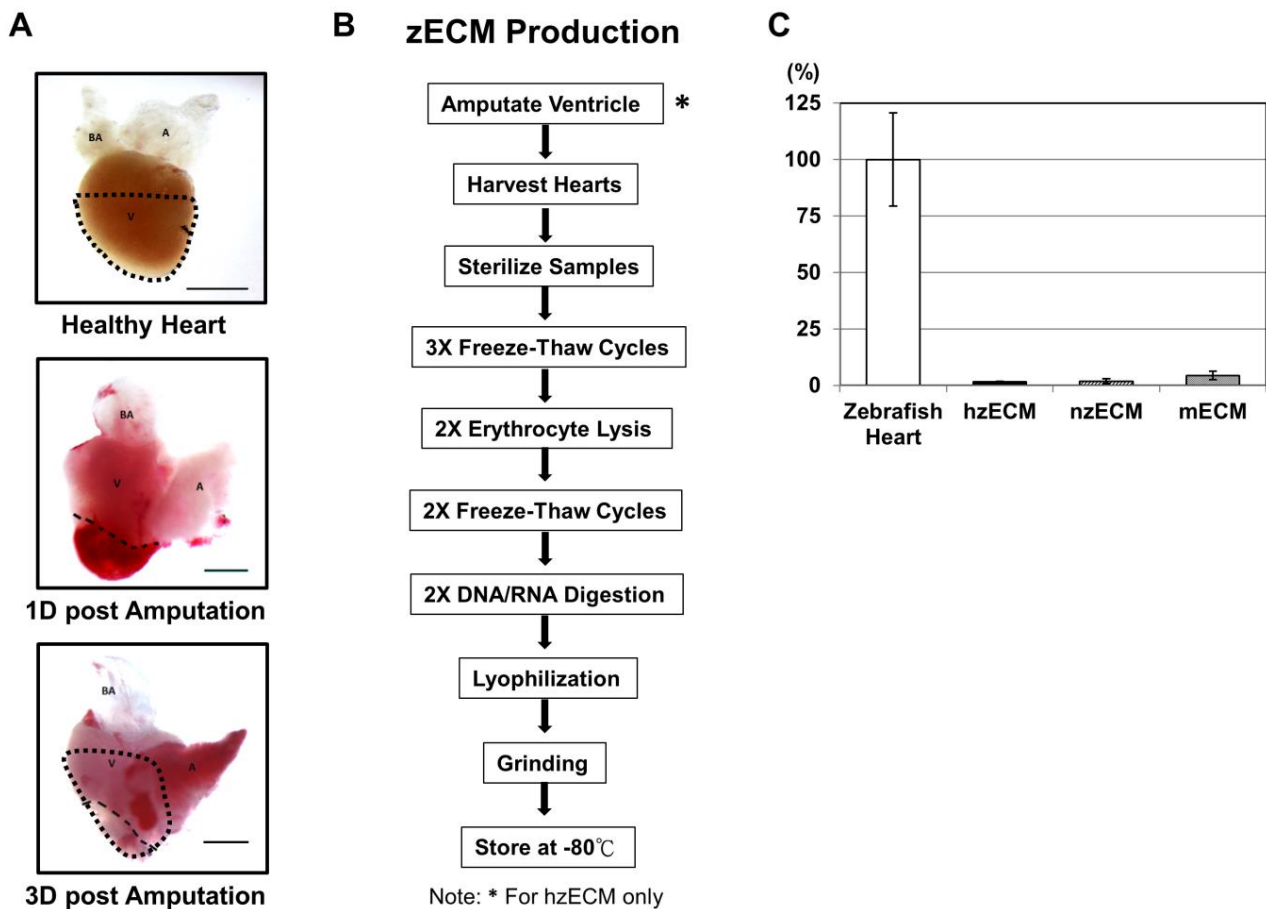

**fig. S1. Amputated zebrafish hearts and decellularization processes.** (A) Representative images of zebrafish hearts: (A) healthy, (B) 1-day, and (C) 3-day post amputation. Roughly 70% of the ventricular tissue (dotted lines), including the regenerating area in the amputated heart, is harvested. (B) The work flow of production of decellularized zebrafish heart ECM. (C) DNA assay shows residual DNA contents in decellularized ECM: hzECM, nzECM, and mECM; results are normalized to DNA contained in normal zebrafish hearts by unit dry weight.

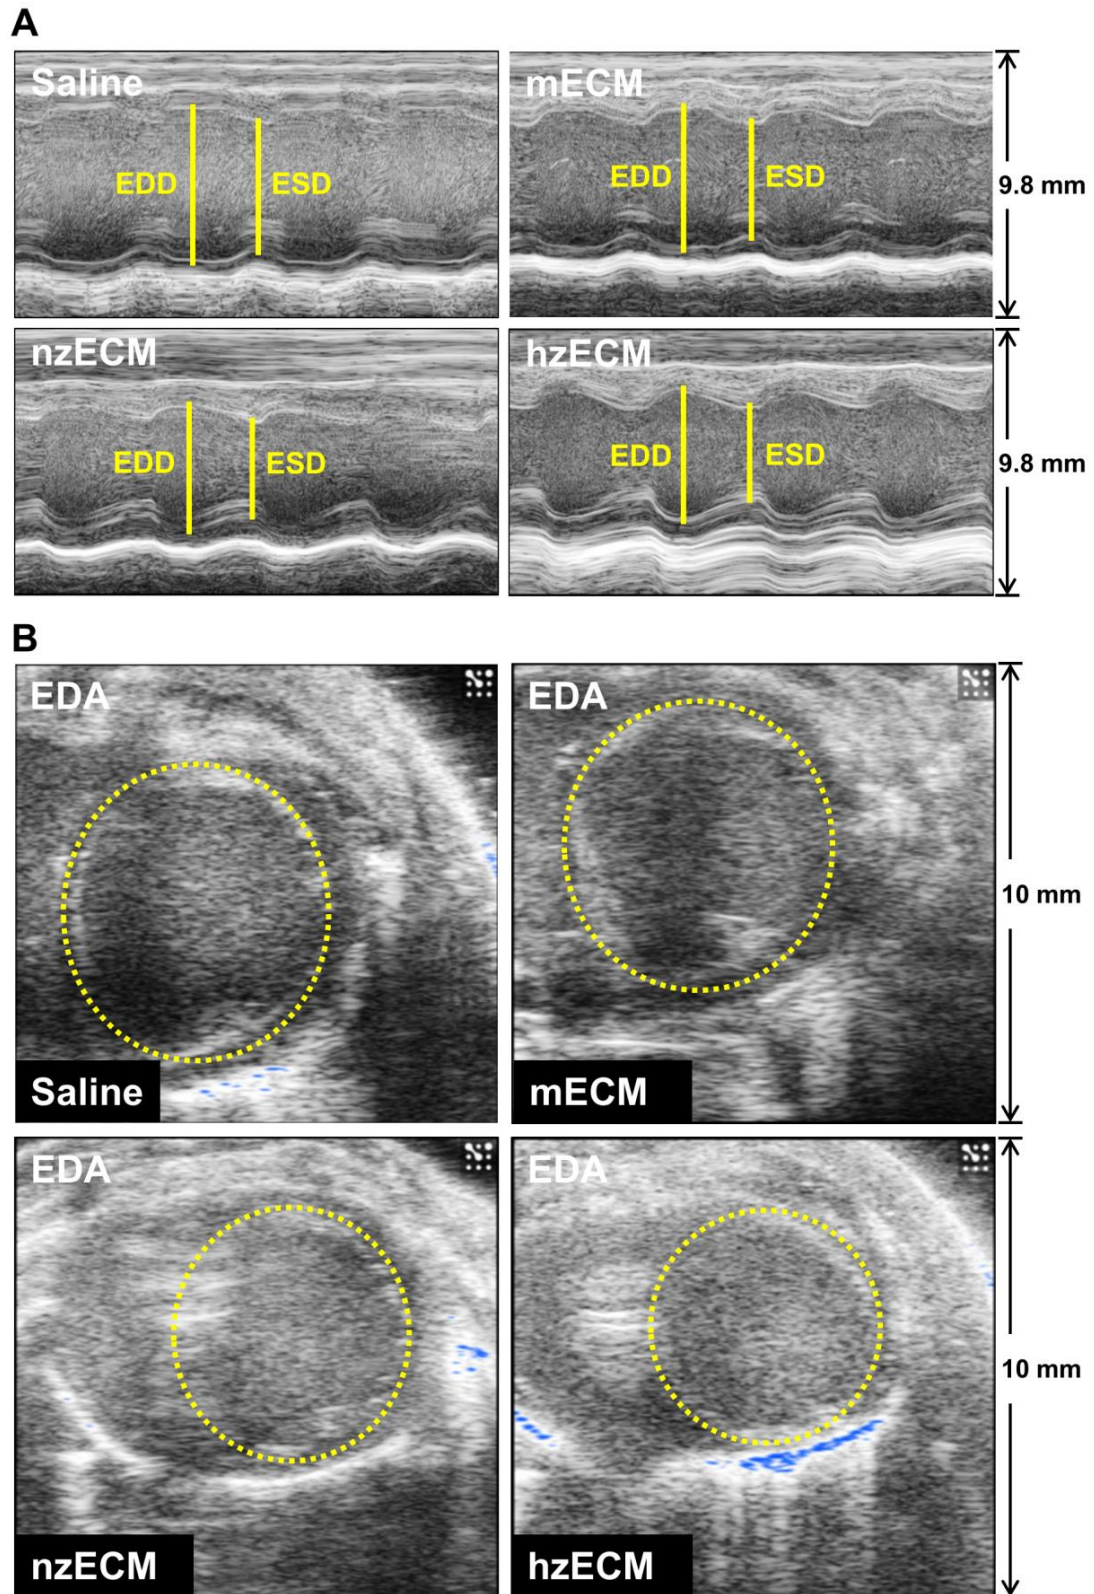

**fig. S2. Representative LV images of M- and B-mode echocardiography.** End-systolic dimension (ESD) and end-diastolic dimension (EDD) are indicated by yellow lines in (A). Dotted circles in (B) approximate the left ventricular wall at the end-diastole.



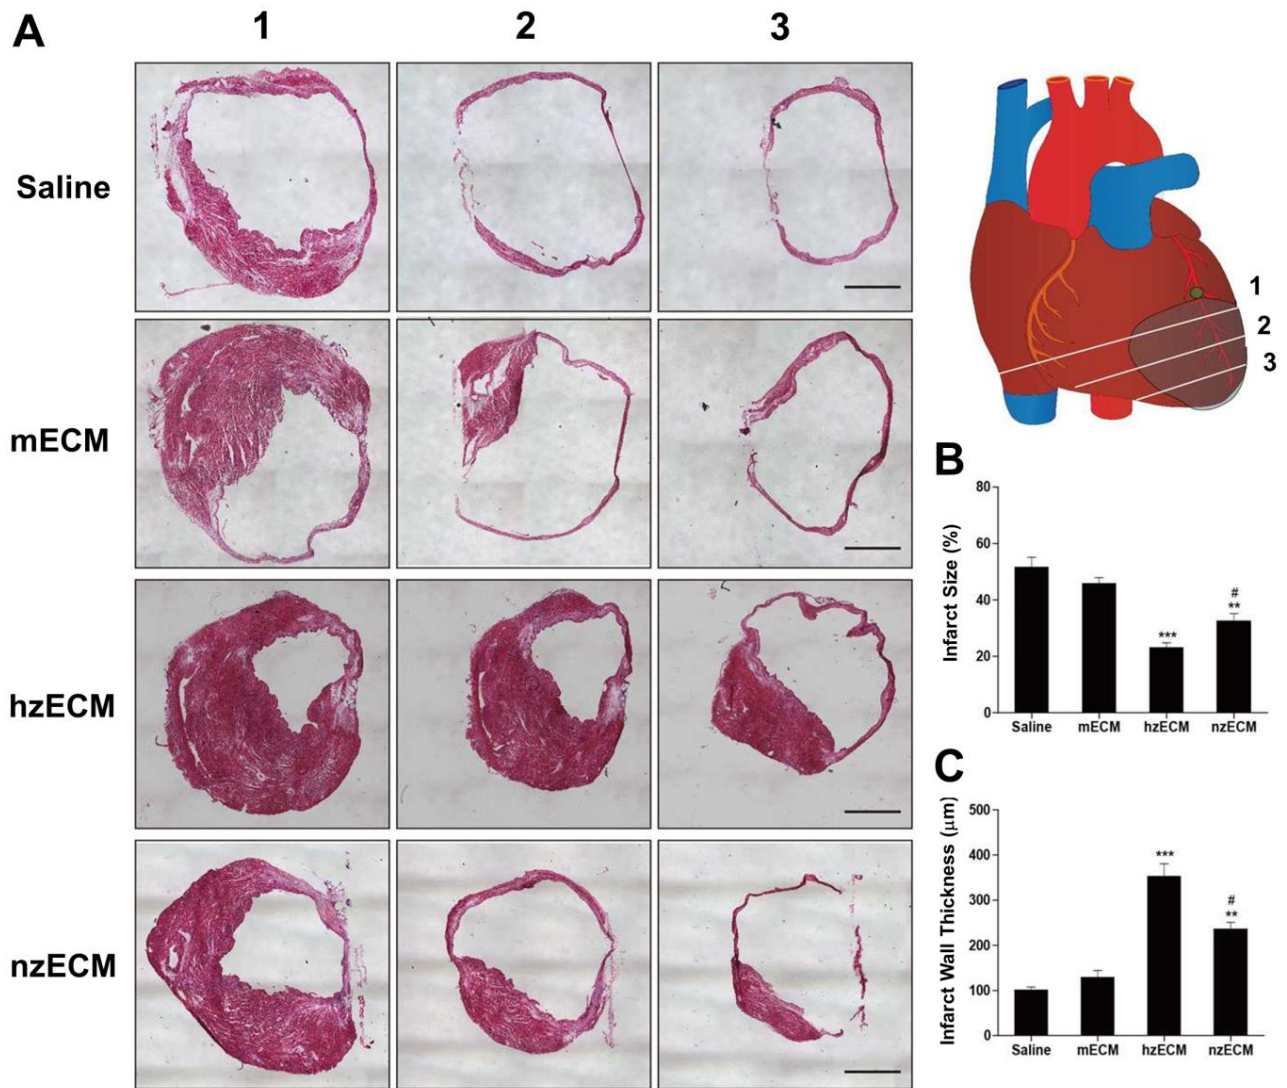

**fig. S3. Histological analysis of mouse hearts after zECM treatment.** (A) Representative H&E staining images of serially sectioned mouse hearts at 6 weeks post-MI. 1, 2, and 3 approximate the section level in the model heart (scale bars = 1 mm). (B) Analysis of the infarct size with H&E stained sections at level 1 (N = 4 per group). (C) Analysis of the left ventricular wall thickness with H&E stained sections at level 1 (N = 4 per group). \*\* $p < 0.01$ , \*\*\* $p < 0.001$  compared to mECM and saline; # $p < 0.05$  hzECM vs nzECM). All quantitative data represent means  $\pm$  SD.

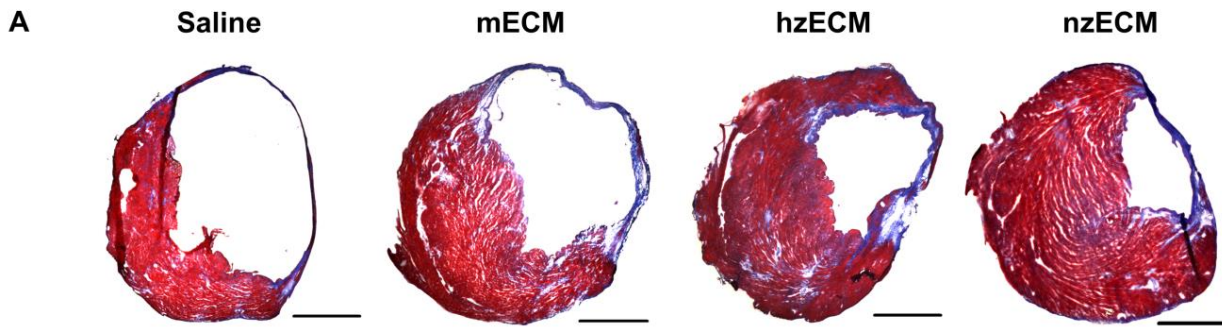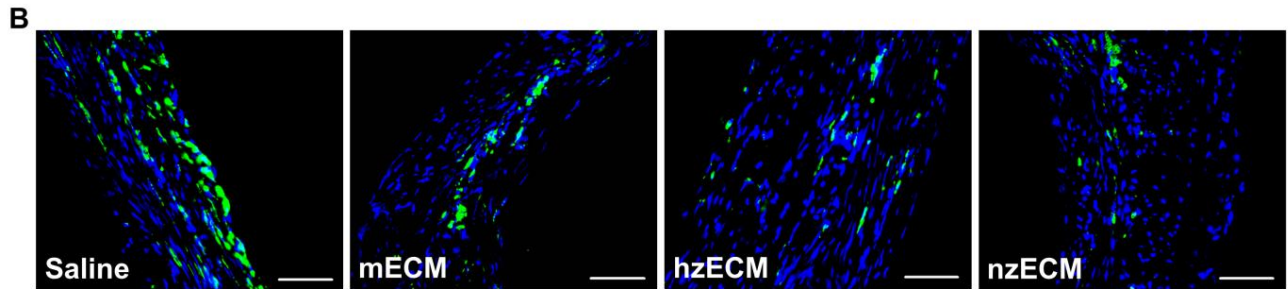

**fig. S4. Fibrosis and chronic inflammation.** (A) Myocardial fibrosis at 6 weeks post-MI is revealed by Masson's trichrome stain in transverse sections of hearts injected with saline, mECM, nzECM, or hzECM (collagen in blue/purple, cardiac muscle in red; scale bars = 1 mm). (B) Detection of chronic phagocytic cell infiltration by anti-mouse CD68 immunohistochemistry at 6 weeks post-MI in transverse sections of hearts injected with saline, mECM, nzECM, or hzECM (CD68 in green; scale bars = 50  $\mu$ m).



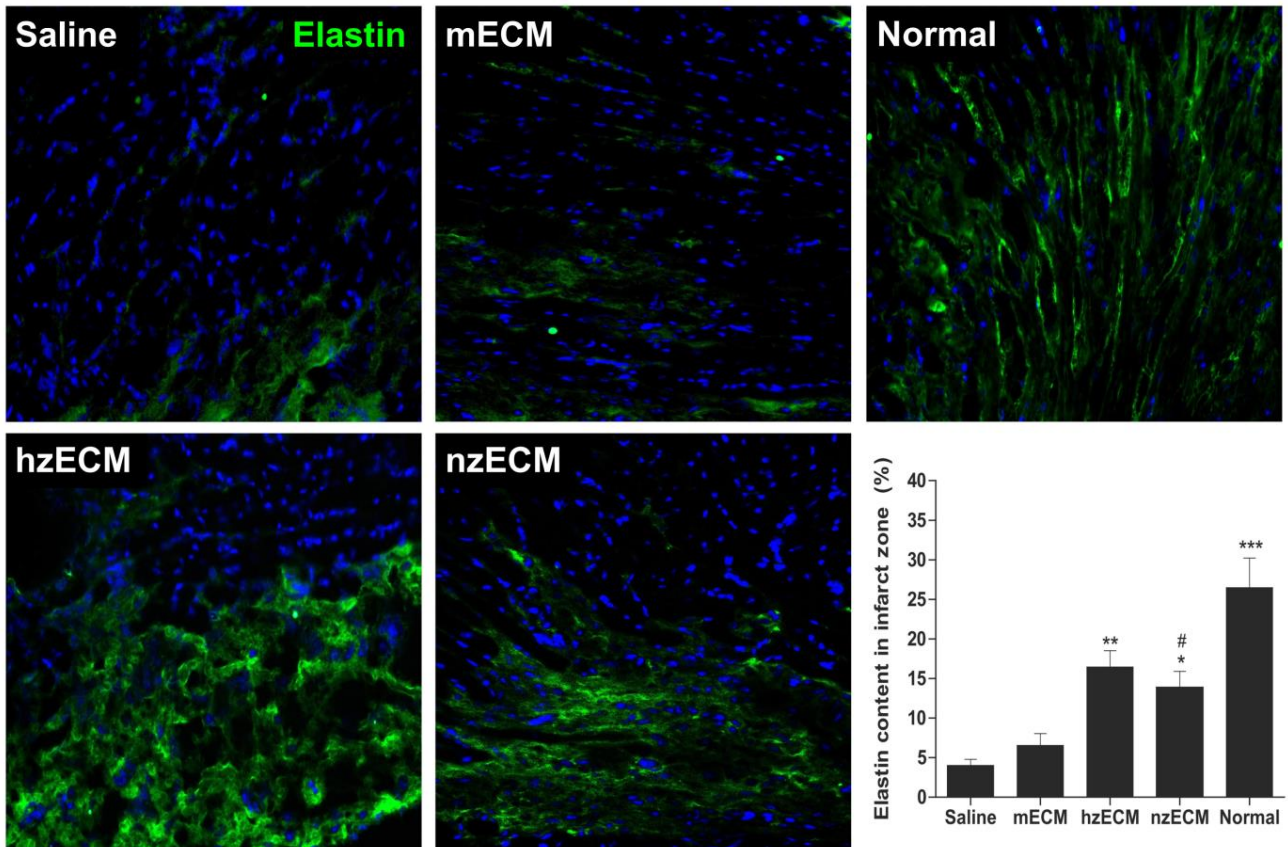

**fig. S5. Analysis of elastin within the infarct zone in zECM-treated hearts.** Representative images show anti-elastin immunostaining (elastin in green and DAPI in blue) at the infarct zone in normal, saline control, mECM-, hzECM-, and nzECM-treated hearts. Quantification of the elastin content at the infarct zone indicates significantly more elastin is preserved in both hzECM- and nzECM-treated hearts. \* $p < 0.05$ , \*\* $p < 0.01$ , \*\*\* $p < 0.001$ , compared to saline and mECM. All quantitative data represent means  $\pm$  SD.

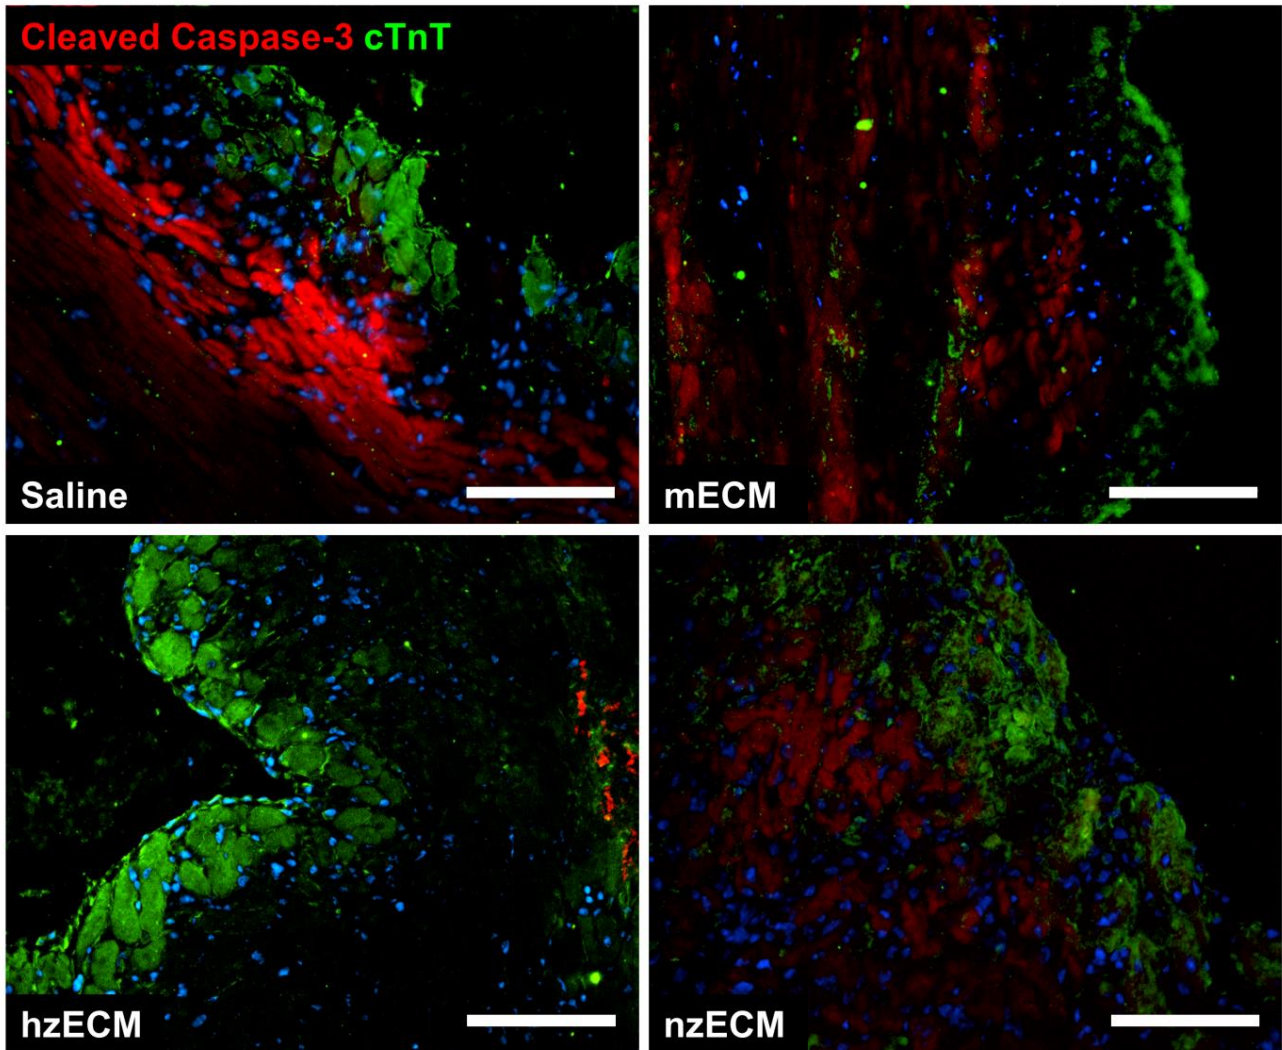

**fig. S6. Cardiomyocyte apoptosis.** Dual immunofluorescent detection of cleaved caspase-3+/cTnT+ apoptotic cardiomyocytes at 3 days post-MI at the infarct area (cleaved caspase-3 in red, cTnT in green, and DAPI in blue; scale bars = 100  $\mu$ m).

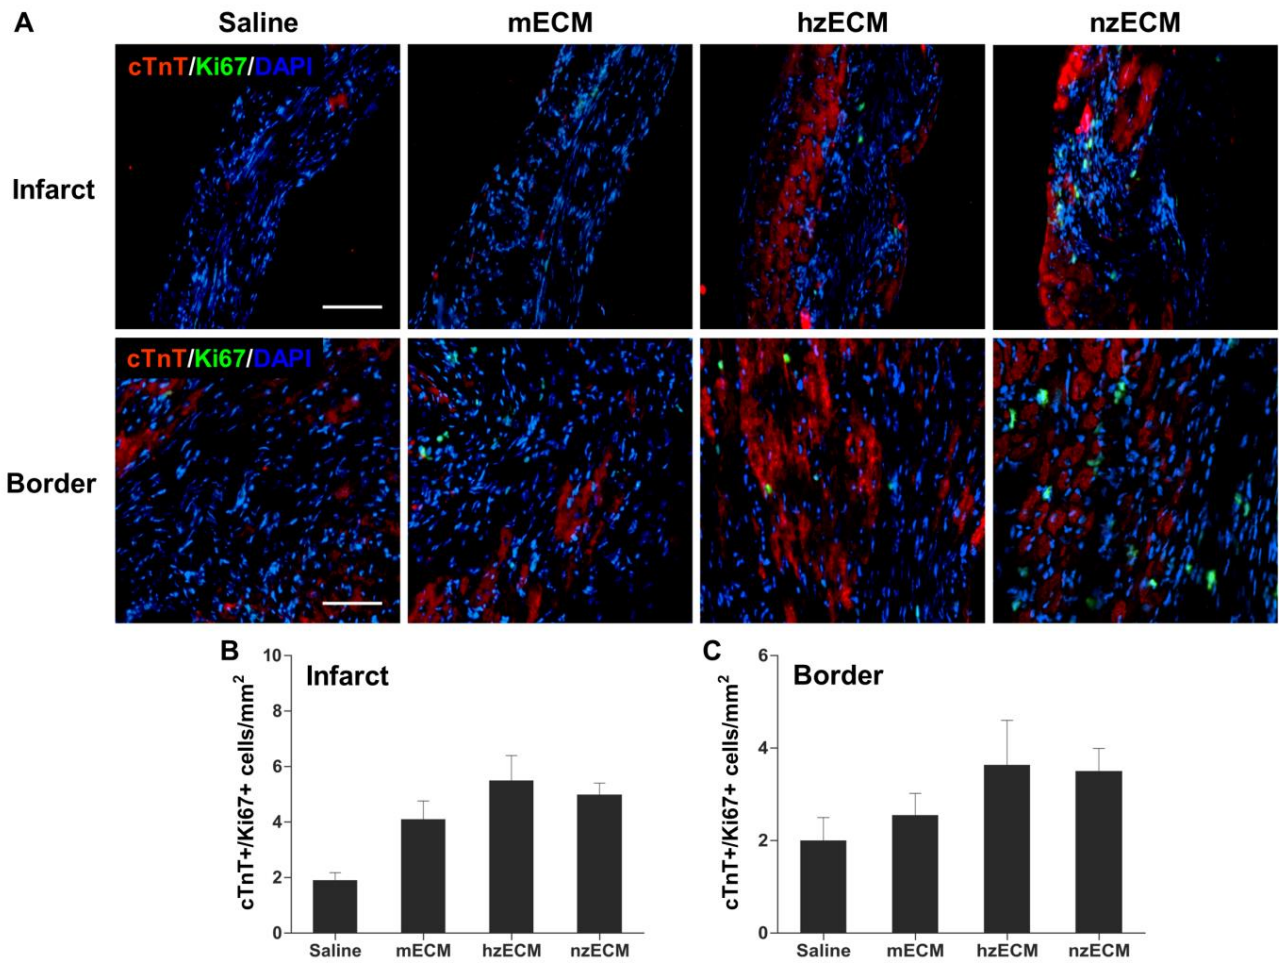

**fig. S7. Cardiomyocyte proliferation at 6 weeks after MI.** (A) Dual immunofluorescent detection of cTnT+/Ki67+ cardiomyocytes at 6 weeks post-MI at the mid-infarct level of mouse left ventricles (scale bars = 50  $\mu$ m). Quantification of cTnT+/Ki67+ cardiomyocytes at the (B) infarct and (C) peri-infarct border zone. All  $p > 0.05$ . All quantitative data represent means  $\pm$  SD.

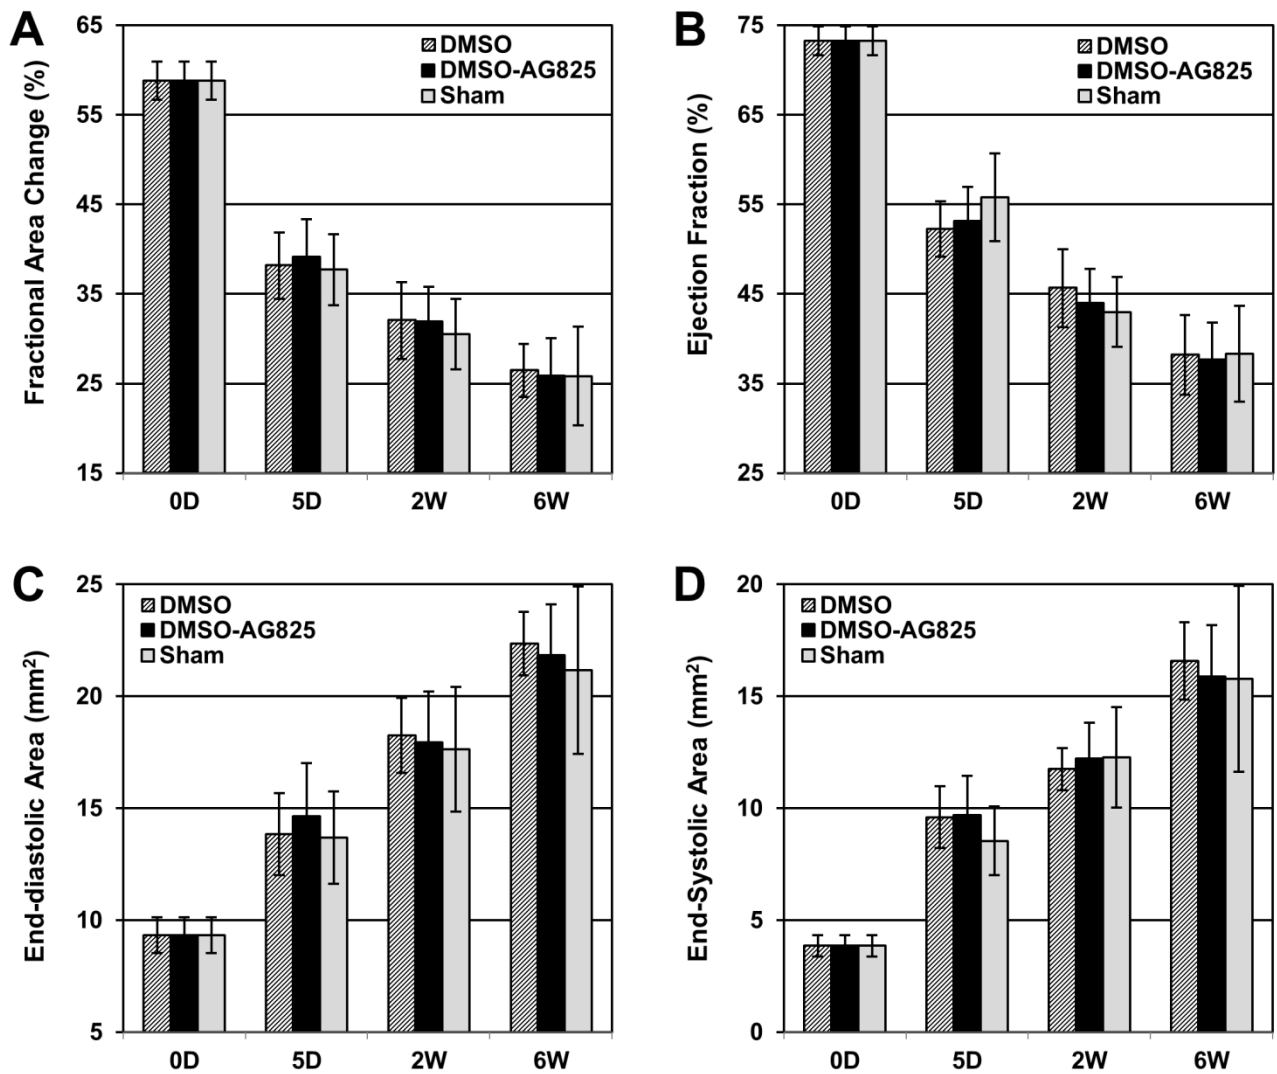

**fig. S8. Echocardiographic analysis of cardiac function in control mice receiving myocardial saline injections and an intraperitoneal sham or DMSO injection with or without the ErbB2 inhibitor AG825 after AMI.** When compared with the DMSO-AG825 or sham group, the DMSO group exhibited no significant difference at all time points over the course of 6 weeks in **(A)** fractional area change, **(B)** ejection fraction, **(C)** end-diastolic area, and **(D)** end-systolic area (N=4 per group, all  $p > 0.05$ ). Please note that the DMSO-AG825 group is equivalent to the Saline control group in Fig. 8.



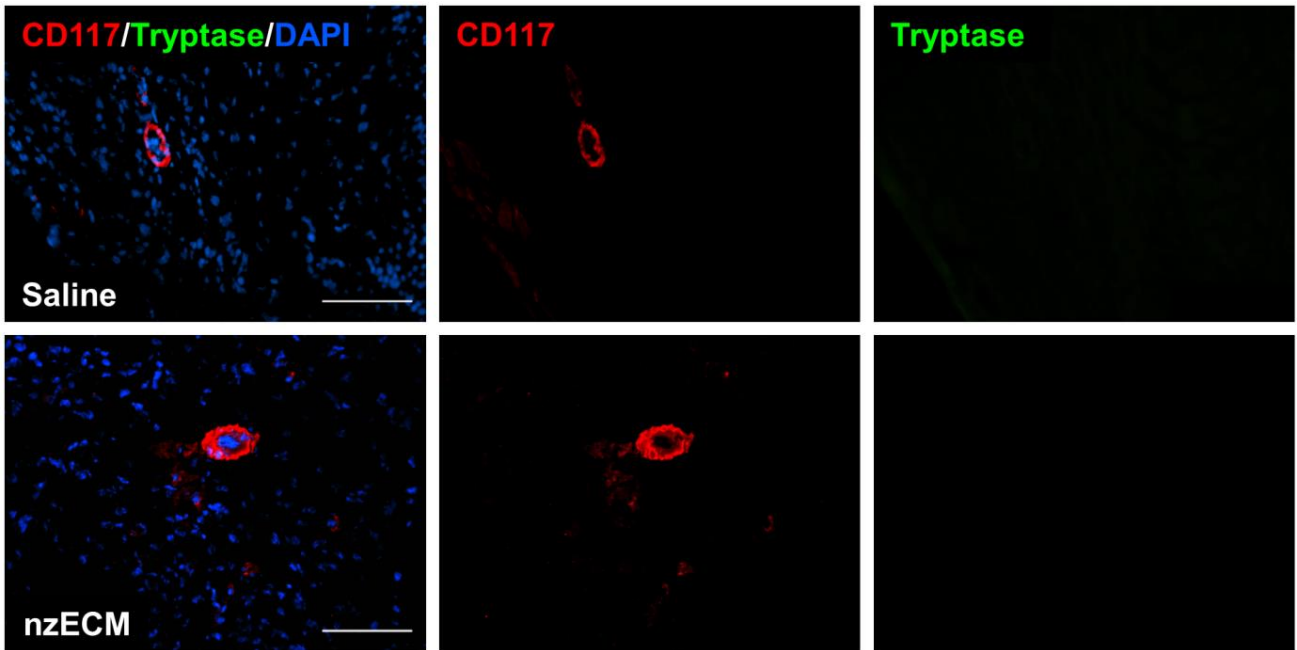

**fig. S9. c-kit<sup>+</sup> cells do not express mast cell marker tryptase.** Dual immunofluorescent detection of c-kit (CD117) and tryptase at 3 days post-MI showed no c-kit<sup>+</sup> cells expressing tryptase in zECM and control groups (CD117 in red, tryptase in green, and DAPI in blue; scale bars = 100  $\mu$ m).



| <b>Supplemental Table S1_Danre</b>                                                                                            |                   |                    |           |                 |                 |                 |                 |
|-------------------------------------------------------------------------------------------------------------------------------|-------------------|--------------------|-----------|-----------------|-----------------|-----------------|-----------------|
| <b>Identified Protein</b>                                                                                                     | <b>Gene Name</b>  | <b>Accession #</b> | <b>MW</b> | <b>nzEC M-1</b> | <b>nzEC M-2</b> | <b>hzEC M-1</b> | <b>hzEC M-2</b> |
| 143BA_DANRE 14-3-3 protein beta/alpha-A GN=ywhaba                                                                             | ywhaba            | Q5PRD0             | 28 kDa    | 88% (88%)       |                 | 64% (64%)       | 100% (100%)     |
| A2ARG7_DANRE Uncharacterized protein OS=Danio rerio GN=atp5ib PE=4 SV=2                                                       | atp5ib            | A2ARG7             | 8 kDa     | 100% (100%)     | 100% (100%)     | 100% (100%)     | 100% (100%)     |
| A3KPR4_DANRE Histone H4 OS=Danio rerio GN=wu:fe37d09 PE=3 SV=1                                                                | wu:fe37d09        | A3KPR4 (+2)        | 11 kDa    | 100% (100%)     | 100% (100%)     | 100% (100%)     | 62% (62%)       |
| A4VAK4_DANRE Heat shock protein 1 OS=Danio rerio GN=hspb1 PE=2 SV=1                                                           | GN=hspb1          | A4VAK4 (+1)        | 22 kDa    | 100% (100%)     | 100% (100%)     | 100% (100%)     | 100% (100%)     |
| A8BBI6_DANRE Lrrc15 (Fragment) OS=Danio rerio GN=lrrc15 PE=2 SV=1                                                             | GN=lrrc15         | A8BBI6             | 58 kDa    | 91% (91%)       | 81% (81%)       | 100% (100%)     | 52% (52%)       |
| A8E5I7_DANRE Voltage-dependent anion channel 3 OS=Danio rerio GN=vdac3 PE=2 SV=1                                              | vdac3             | A8E5I7 (+2)        | 30 kDa    | 100% (100%)     | 100% (100%)     | 100% (100%)     | 100% (100%)     |
| A8WG85_DANRE Ckmt2 protein OS=Danio rerio GN=ckmt2 PE=2 SV=1                                                                  | ckmt2             | A8WG85 (+1)        | 46 kDa    | 96% (96%)       | 66% (66%)       | 100% (100%)     | 68% (68%)       |
| A8WGC6_DANRE ATP synthase subunit beta OS=Danio rerio GN=atp5b PE=2 SV=1                                                      | atp5b             | A8WGC6             | 55 kDa    | 100% (100%)     | 100% (100%)     | 100% (100%)     | 100% (100%)     |
| A9C3Q4_DANRE Uncharacterized protein OS=Danio rerio GN=atp2a2a PE=2 SV=1                                                      | atp2a2a           | A9C3Q4 (+2)        | 115 kDa   | 100% (100%)     |                 |                 | 76% (76%)       |
| A9JT52_DANRE Acadvl protein OS=Danio rerio GN=acadvl PE=2 SV=1                                                                | acadvl            | A9JT52 (+2)        | 71 kDa    | 98% (98%)       | 100% (100%)     | 56% (56%)       | 80% (80%)       |
| B0R0F7_DANRE Uncharacterized protein OS=Danio rerio GN=cmlc1 PE=2 SV=1                                                        | cmlc1             | B0R0F7             | 22 kDa    | 100% (100%)     | 100% (100%)     | 100% (100%)     | 100% (100%)     |
| B0R0K9_DANRE Uncharacterized protein OS=Danio rerio GN=si:ch211-103n10.5 PE=4 SV=1                                            | si:ch211-103n10.5 | B0R0K9             | 19 kDa    |                 |                 | 99% (99%)       | 81% (81%)       |
| B3DFS9_DANRE Myosin, heavy polypeptide 11, smooth muscle OS=Danio rerio GN=myh11a PE=2 SV=1                                   | myh11a            | B3DFS9 (+1)        | 228 kDa   |                 |                 |                 | 99% (99%)       |
| B3DJP9_DANRE Myosin, heavy polypeptide 6, cardiac muscle, alpha OS=Danio rerio GN=myh6 PE=2 SV=1                              | myh6              | B3DJP9             | 223 kDa   | 100% (100%)     | 100% (100%)     | 100% (100%)     | 100% (100%)     |
| CHCH6_DANRE Coiled-coil-helix-coiled-coil-helix domain-containing protein 6, mitochondrial OS=Danio rerio GN=chchd6 PE=2 SV=1 | chchd6            | Q63ZW2             | 28 kDa    | 100% (100%)     | 100% (100%)     | 98% (98%)       | 100% (100%)     |
| COX2_DANRE Cytochrome c oxidase subunit 2 OS=Danio rerio GN=mt-co2 PE=3 SV=1                                                  | mt-co2            | Q9MIY7             | 26 kDa    | 100% (100%)     | 100% (100%)     | 70% (70%)       | 100% (100%)     |
| E7EZX1_DANRE Histone H2A OS=Danio rerio GN=CR762436.4 PE=3 SV=1                                                               | CR762436.4        | E7EZX1 (+4)        | 14 kDa    | 100% (100%)     | 100% (100%)     | 100% (100%)     | 100% (100%)     |
| E7F1L7_DANRE Uncharacterized protein OS=Danio rerio GN=CU302436.1 PE=4 SV=1                                                   | CU302436.1        | E7F1L7             | 292 kDa   |                 | 51% (51%)       | 100% (100%)     | 100% (100%)     |

|                                                                                     |                    |             |         |             |             |             |             |
|-------------------------------------------------------------------------------------|--------------------|-------------|---------|-------------|-------------|-------------|-------------|
| E7F5J9_DANRE Uncharacterized protein OS=Danio rerio GN=tnni1b PE=4 SV=1             | tnni1b             | E7F5J9 (+2) | 21 kDa  | 100% (100%) | 100% (100%) | 100% (100%) | 100% (100%) |
| E7FAV6_DANRE Uncharacterized protein OS=Danio rerio GN=LOC564077 PE=4 SV=1          | LOC564077          | E7FAV6      | 57 kDa  | 100% (100%) | 100% (100%) | 54% (54%)   | 100% (100%) |
| E7FES0_DANRE Uncharacterized protein OS=Danio rerio PE=4 SV=1                       |                    | E7FES0      | 30 kDa  | 100% (100%) |             | 98% (98%)   | 97% (97%)   |
| E9QCD1_DANRE Uncharacterized protein OS=Danio rerio GN=fga PE=2 SV=1                | fga                | E9QCD1      | 50 kDa  |             |             | 100% (100%) | 100% (100%) |
| E9QCG6_DANRE Uncharacterized protein OS=Danio rerio GN=colla2 PE=2 SV=1             | colla2             | E9QCG6 (+1) | 127 kDa | 100% (100%) | 100% (100%) | 100% (100%) | 100% (100%) |
| E9QG44_DANRE Uncharacterized protein OS=Danio rerio PE=3 SV=1                       |                    | E9QG44      | 17 kDa  |             | 73% (73%)   | 78% (78%)   | 100% (100%) |
| E9QGR6_DANRE Uncharacterized protein OS=Danio rerio GN=tmod1 PE=4 SV=1              | tmod1              | E9QGR6      | 40 kDa  |             | 100% (100%) |             |             |
| F1Q615_DANRE Uncharacterized protein OS=Danio rerio GN=mybpc3 PE=2 SV=1             | mybpc3             | F1Q615      | 144 kDa | 55% (55%)   | 100% (100%) |             | 99% (99%)   |
| F1Q766_DANRE Uncharacterized protein OS=Danio rerio GN=zgc:56085 PE=2 SV=1          | zgc:56085          | F1Q766      | 47 kDa  | 100% (100%) | 100% (100%) | 100% (100%) | 100% (100%) |
| F1Q9A0_DANRE Uncharacterized protein (Fragment) OS=Danio rerio GN=sorbs2a PE=4 SV=1 | sorbs2a            | F1Q9A0      | 141 kDa | 100% (100%) | 100% (100%) | 100% (100%) | 100% (100%) |
| F1QBP1_DANRE Uncharacterized protein OS=Danio rerio GN=myoz2b PE=4 SV=1             | myoz2b             | F1QBP1      | 29 kDa  | 100% (100%) | 89% (89%)   | 100% (100%) | 100% (100%) |
| F1QDL1_DANRE Uncharacterized protein OS=Danio rerio GN=colla1b PE=4 SV=1            | colla1b            | F1QDL1 (+1) | 137 kDa | 100% (100%) | 76% (76%)   | 95% (95%)   | 100% (100%) |
| F1QG64_DANRE Histone H2B OS=Danio rerio GN=zgc:112234 PE=3 SV=1                     | zgc:112234         | F1QG64      | 15 kDa  | 100% (100%) | 98% (98%)   | 100% (100%) | 100% (100%) |
| F1QJ99_DANRE Uncharacterized protein (Fragment) OS=Danio rerio GN=cox5ab PE=2 SV=1  | cox5ab             | F1QJ99 (+1) | 17 kDa  | 100% (100%) | 100% (100%) | 100% (100%) | 61% (61%)   |
| F1QJK4_DANRE Uncharacterized protein OS=Danio rerio GN=si:ch211-150d5.2 PE=4 SV=2   | si:ch211-150d5.2   | F1QJK4      | 196 kDa |             |             |             | 100% (100%) |
| F1QKG7_DANRE Uncharacterized protein OS=Danio rerio GN=tpm4a PE=2 SV=1              | tpm4a              | F1QKG7      | 33 kDa  | 100% (100%) | 100% (100%) | 100% (100%) | 100% (100%) |
| F1QSE1_DANRE Uncharacterized protein OS=Danio rerio GN=vmhcl PE=2 SV=1              | vmhcl              | F1QSE1 (+1) | 223 kDa | 100% (100%) | 100% (100%) | 100% (100%) | 100% (100%) |
| F1R3F7_DANRE Uncharacterized protein OS=Danio rerio GN=si:ch1073-329n19.2 PE=4 SV=1 | si:ch1073-329n19.2 | F1R3F7 (+1) | 30 kDa  | 100% (100%) | 100% (100%) | 68% (68%)   | 85% (85%)   |
| F1R446_DANRE Uncharacterized protein OS=Danio rerio GN=spna2 PE=2 SV=1              | spna2              | F1R446      | 285 kDa | 100% (100%) | 100% (100%) | 100% (100%) | 100% (100%) |
| F1R6I1_DANRE Uncharacterized protein (Fragment) OS=Danio rerio                      | LOC402880          | F1R6I1      | 20      | 100%        | 100%        | 100%        | 100%        |

|                                                                                           |            |                |            |                |                |                |                |
|-------------------------------------------------------------------------------------------|------------|----------------|------------|----------------|----------------|----------------|----------------|
| GN=LOC402880 PE=4 SV=1                                                                    |            | (+1)           | kDa        | (100%)         | (100%)         | (100%)         | (100%)         |
| F1R8U0_DANRE Uncharacterized protein OS=Danio rerio<br>GN=zgc:153629 PE=3 SV=1            | zgc:153629 | F1R8U0<br>(+1) | 48<br>kDa  | 100%<br>(100%) | 100%<br>(100%) | 100%<br>(100%) | 100%<br>(100%) |
| F1R8W3_DANRE Uncharacterized protein OS=Danio rerio GN=desma<br>PE=2 SV=1                 | desma      | F1R8W3         | 56<br>kDa  | 100%<br>(100%) | 100%<br>(100%) | 100%<br>(100%) | 100%<br>(100%) |
| F1RBH3_DANRE Uncharacterized protein OS=Danio rerio GN=chchd6b<br>PE=4 SV=1               | chchd6b    | F1RBH3<br>(+1) | 26<br>kDa  | 100%<br>(100%) |                |                | 51%<br>(51%)   |
| H9GYI1_DANRE Uncharacterized protein (Fragment) OS=Danio rerio<br>GN=zgc:101560 PE=4 SV=1 | zgc:101560 | H9GYI1         | 21<br>kDa  | 100%<br>(100%) | 100%<br>(100%) | 100%<br>(100%) | 100%<br>(100%) |
| HBB2_DANRE Hemoglobin subunit beta-2 OS=Danio rerio GN=ba2 PE=1<br>SV=3                   | ba2        | Q90485         | 16<br>kDa  | 60%<br>(60%)   |                | 100%<br>(100%) | 100%<br>(100%) |
| K2C8_DANRE Keratin, type II cytoskeletal 8 OS=Danio rerio GN=krt8<br>PE=1 SV=1            | krt8       | Q6NWF6         | 58<br>kDa  | 100%<br>(100%) | 100%<br>(100%) | 100%<br>(100%) | 100%<br>(100%) |
| LAMC1_DANRE Laminin subunit gamma-1 OS=Danio rerio GN=lamc1<br>PE=2 SV=2                  | lamc1      | Q1LVF0         | 176<br>kDa | 100%<br>(100%) | 100%<br>(100%) | 88%<br>(88%)   | 100%<br>(100%) |
| MYG_DANRE Myoglobin OS=Danio rerio GN=mb PE=2 SV=3                                        | mb         | Q6VN46         | 16<br>kDa  | 100%<br>(100%) | 100%<br>(100%) | 100%<br>(100%) | 100%<br>(100%) |
| Q08BA1_DANRE ATP synthase subunit alpha OS=Danio rerio GN=atp5a1<br>PE=2 SV=1             | atp5a1     | Q08BA1         | 60<br>kDa  | 100%<br>(100%) | 100%<br>(100%) | 100%<br>(100%) | 100%<br>(100%) |
| Q1RLV5_DANRE Uncharacterized protein (Fragment) OS=Danio rerio<br>GN=slmapa PE=2 SV=1     | slmapa     | Q1RLV5         | 50<br>kDa  |                |                | 64%<br>(64%)   | 100%<br>(100%) |
| Q2YDR5_DANRE Actinin, alpha 2 OS=Danio rerio GN=actn2 PE=2 SV=1                           | actn2      | Q2YDR5         | 103<br>kDa | 100%<br>(100%) |                |                | 47%<br>(47%)   |
| Q3YAA0_DANRE Integrin beta OS=Danio rerio GN=itgb1b PE=2 SV=1                             | itgb1b     | Q3YAA0         | 88<br>kDa  | 100%<br>(100%) | 75%<br>(75%)   |                | 100%<br>(100%) |
| Q4JHL7_DANRE Voltage-dependent anion channel 2 OS=Danio rerio<br>GN=vdac2 PE=2 SV=1       | vdac2      | Q4JHL7<br>(+1) | 30<br>kDa  | 100%<br>(100%) | 100%<br>(100%) | 100%<br>(100%) | 100%<br>(100%) |
| Q4VBU7_DANRE Cytochrome c oxidase subunit Vaa OS=Danio rerio<br>GN=cox5aa PE=2 SV=1       | cox5aa     | Q4VBU7         | 16<br>kDa  | 100%<br>(100%) | 100%<br>(100%) | 100%<br>(100%) | 100%<br>(100%) |
| Q4VBV1_DANRE Cytochrome b-c1 complex subunit 7 OS=Danio rerio<br>GN=uqcrb PE=3 SV=1       | uqcrb      | Q4VBV1         | 13<br>kDa  | 100%<br>(100%) | 100%<br>(100%) | 99%<br>(99%)   | 80%<br>(80%)   |
| Q58XP5_DANRE Fibronectin 1b OS=Danio rerio GN=fn1b PE=2 SV=1                              | fn1b       | Q58XP5         | 276<br>kDa |                |                |                | 100%<br>(100%) |
| Q5BJA2_DANRE Uncharacterized protein OS=Danio rerio GN=ndufa5<br>PE=4 SV=1                | ndufa5     | Q5BJA2         | 13<br>kDa  | 100%<br>(100%) | 51%<br>(51%)   | 100%<br>(100%) | 100%<br>(100%) |
| Q68EI6_DANRE Cyc1 protein (Fragment) OS=Danio rerio GN=cyc1 PE=2<br>SV=1                  | cyc1       | Q68EI6         | 33<br>kDa  | 100%<br>(100%) | 100%<br>(100%) | 100%<br>(100%) | 100%<br>(100%) |
| Q6DEH8_DANRE Uncharacterized protein OS=Danio rerio GN=sh3bgr<br>PE=2 SV=1                | sh3bgr     | Q6DEH8         | 21<br>kDa  | 98%<br>(98%)   | 94%<br>(94%)   |                | 100%<br>(100%) |

|                                                                                                                               |           |             |        |             |             |             |             |
|-------------------------------------------------------------------------------------------------------------------------------|-----------|-------------|--------|-------------|-------------|-------------|-------------|
| Q6DGK4_DANRE Zgc:92880 OS=Danio rerio GN=zgc:92880 PE=2 SV=1                                                                  | zgc:92880 | Q6DGK4 (+1) | 16 kDa |             |             | 95% (95%)   | 100% (100%) |
| Q6DRD1_DANRE ATP synthase oligomycin sensitivity conferral protein OS=Danio rerio GN=atp5o PE=2 SV=1                          | atp5o     | Q6DRD1      | 22 kDa | 100% (100%) | 100% (100%) | 100% (100%) | 100% (100%) |
| Q6IQ59_DANRE Ubiquinol-cytochrome c reductase core protein II OS=Danio rerio GN=uqcrc2b PE=2 SV=1                             | uqcrc2b   | Q6IQ59      | 48 kDa | 100% (100%) | 100% (100%) | 100% (100%) | 100% (100%) |
| Q6IQR3_DANRE Actin, alpha, cardiac muscle 1a OS=Danio rerio GN=actc1a PE=2 SV=1                                               | actc1a    | Q6IQR3      | 42 kDa | 100% (100%) | 100% (100%) | 100% (100%) | 100% (100%) |
| Q6NSN3_DANRE Ubiquinol-cytochrome c reductase core protein I OS=Danio rerio GN=uqcrc1 PE=2 SV=1                               | uqcrc1    | Q6NSN3 (+1) | 52 kDa | 98% (98%)   | 98% (98%)   | 98% (98%)   | 100% (100%) |
| Q6NYE1_DANRE Fibrinogen, B beta polypeptide OS=Danio rerio GN=fgb PE=2 SV=1                                                   | fgb       | Q6NYE1      | 54 kDa |             |             | 100% (100%) | 100% (100%) |
| Q6NYV3_DANRE Uncharacterized protein OS=Danio rerio GN=h1f0 PE=2 SV=1                                                         | h1f0      | Q6NYV3      | 21 kDa | 100% (100%) | 100% (100%) | 100% (100%) | 100% (100%) |
| Q6P0T0_DANRE NADH dehydrogenase (Ubiquinone) Fe-S protein 8, (NADH-coenzyme Q reductase) OS=Danio rerio GN=ndufs8a PE=2 SV=1  | ndufs8a   | Q6P0T0      | 24 kDa | 100% (100%) | 100% (100%) | 84% (84%)   | 92% (92%)   |
| Q6PC77_DANRE ATP synthase, H <sup>+</sup> transporting, mitochondrial F0 complex, subunit d OS=Danio rerio GN=atp5h PE=2 SV=1 | atp5h     | Q6PC77      | 18 kDa | 100% (100%) | 100% (100%) | 100% (100%) | 100% (100%) |
| Q6PEI6_DANRE Aconitase 2, mitochondrial OS=Danio rerio GN=aco2 PE=2 SV=1                                                      | aco2      | Q6PEI6      | 85 kDa | 100% (100%) | 100% (100%) | 81% (81%)   | 100% (100%) |
| Q6PFS4_DANRE Inner membrane protein, mitochondrial (Mitofilin) OS=Danio rerio GN=immt PE=2 SV=1                               | immt      | Q6PFS4      | 83 kDa | 100% (100%) | 100% (100%) | 100% (100%) | 100% (100%) |
| Q6TNQ9_DANRE Succinate dehydrogenase complex, subunit A, flavoprotein (Fp) OS=Danio rerio GN=sdha PE=2 SV=1                   | sdha      | Q6TNQ9      | 73 kDa | 54% (54%)   | 100% (100%) | 73% (73%)   | 97% (97%)   |
| Q6VYM3_DANRE Natriuretic peptide OS=Danio rerio GN=nppa PE=3 SV=1                                                             | nppa      | Q6VYM3      | 12 kDa |             |             | 79% (79%)   | 100% (100%) |
| Q6ZM23_DANRE Uncharacterized protein OS=Danio rerio GN=cox6c PE=2 SV=1                                                        | cox6c     | Q6ZM23      | 8 kDa  | 98% (98%)   | 100% (100%) | 100% (100%) | 100% (100%) |
| Q7T3F0_DANRE Tropomyosin 4 OS=Danio rerio GN=tpm4a PE=2 SV=1                                                                  | tpm4a     | Q7T3F0      | 29 kDa | 57% (57%)   | 85% (85%)   |             | 100% (100%) |
| Q7ZSY4_DANRE Cardiac troponin T OS=Danio rerio GN=tnnt2a PE=2 SV=1                                                            | tnnt2a    | Q7ZSY4 (+2) | 34 kDa | 100% (100%) | 100% (100%) | 100% (100%) | 100% (100%) |
| Q7ZUP6_DANRE Isocitrate dehydrogenase [NADP] OS=Danio rerio GN=idh2 PE=2 SV=1                                                 | idh2      | Q7ZUP6      | 50 kDa | 100% (100%) | 100% (100%) | 61% (61%)   | 100% (100%) |
| Q7ZVG7_DANRE Fibrinogen, gamma polypeptide OS=Danio rerio GN=fgg PE=2 SV=1                                                    | fgg       | Q7ZVG7      | 49 kDa |             |             | 100% (100%) | 100% (100%) |
| Q7ZVX2_DANRE ATPase, Na <sup>+</sup> /K <sup>+</sup> transporting, beta 1a polypeptide OS=Danio rerio GN=atp1b1a PE=2 SV=1    | atp1b1a   | Q7ZVX2      | 35 kDa | 100% (100%) | 100% (100%) | 100% (100%) | 100% (100%) |
| Q7ZYY3_DANRE Heat shock protein 9 OS=Danio rerio GN=hspa9 PE=2                                                                | hspa9     | Q7ZYY3      | 74     | 91%         |             |             | 100%        |

|                                                                                                  |         |        |            |                |                |                |                |
|--------------------------------------------------------------------------------------------------|---------|--------|------------|----------------|----------------|----------------|----------------|
| SV=1                                                                                             |         |        | kDa        | (91%)          |                |                | (100%)         |
| Q800V7_DANRE Cardiac troponin C OS=Danio rerio GN=tnnc1a PE=2 SV=1                               | tnnc1a  | Q800V7 | 18<br>kDa  | 100%<br>(100%) | 100%<br>(100%) | 100%<br>(100%) | 100%<br>(100%) |
| Q801M3_DANRE Myosin light chain 2 Mlc2a OS=Danio rerio GN=myl7 PE=2 SV=1                         | myl7    | Q801M3 | 19<br>kDa  | 100%<br>(100%) | 100%<br>(100%) | 100%<br>(100%) | 100%<br>(100%) |
| Q803B0_DANRE Heat shock 60kD protein 1 (Chaperonin) OS=Danio rerio GN=hspd1 PE=2 SV=1            | hspd1   | Q803B0 | 61<br>kDa  | 100%<br>(100%) | 100%<br>(100%) | 100%<br>(100%) | 100%<br>(100%) |
| Q804G9_DANRE Annexin OS=Danio rerio GN=anxa2a PE=2 SV=1                                          | anxa2a  | Q804G9 | 38<br>kDa  |                |                | 100%<br>(100%) | 100%<br>(100%) |
| Q8JHI0_DANRE Solute carrier family 25 alpha, member 5 OS=Danio rerio GN=slc25a5 PE=2 SV=1        | slc25a5 | Q8JHI0 | 33<br>kDa  | 100%<br>(100%) | 100%<br>(100%) | 100%<br>(100%) | 100%<br>(100%) |
| Q9DGL6_DANRE ATPase, Na+/K+ transporting, alpha 1 polypeptide OS=Danio rerio GN=atp1a1 PE=2 SV=1 | atp1a1  | Q9DGL6 | 113<br>kDa | 97%<br>(97%)   | 100%<br>(100%) |                | 100%<br>(100%) |
| Q9PTR4_DANRE Alpha-cardiac actin OS=Danio rerio GN=actc1a PE=2 SV=1                              | actc1a  | Q9PTR4 | 42<br>kDa  |                |                | 100%<br>(100%) |                |
| Q9W6T5_DANRE Lamin B2 OS=Danio rerio GN=lmnb2 PE=2 SV=1                                          | lmnb2   | Q9W6T5 | 66<br>kDa  |                | 99%<br>(99%)   | 100%<br>(100%) | 100%<br>(100%) |

**Note: The percentage in the table indicates the identification probability of the specified protein.**



| <b>Supplemental Table S2_Mouse</b>                                                                             |                  |                    |           |               |               |
|----------------------------------------------------------------------------------------------------------------|------------------|--------------------|-----------|---------------|---------------|
| <b>Identified Protein</b>                                                                                      | <b>Gene Name</b> | <b>Accession #</b> | <b>MW</b> | <b>mECM-1</b> | <b>mECM-2</b> |
| A2A513_MOUSE Keratin, type I cytoskeletal 10 OS=Mus musculus GN=Krt10 PE=3 SV=1                                | Krt10            | A2A513 (+3)        | 57 kDa    | 100% (100%)   | 100% (100%)   |
| A3KGU7_MOUSE Spectrin alpha chain, non-erythrocytic 1 OS=Mus musculus GN=Sptan1 PE=2 SV=1                      | Sptan1           | A3KGU7 (+1)        | 285 kDa   | 100% (100%)   | 48% (48%)     |
| ACADV_MOUSE Very long-chain specific acyl-CoA dehydrogenase, mitochondrial OS=Mus musculus GN=Acadv1 PE=1 SV=3 | Acadv1           | P50544             | 71 kDa    | 67% (67%)     | 100% (100%)   |
| ACON_MOUSE Aconitate hydratase, mitochondrial OS=Mus musculus GN=Aco2 PE=1 SV=1                                | Aco2             | Q99KI0             | 85 kDa    |               | 100% (100%)   |
| ACTN2_MOUSE Alpha-actinin-2 OS=Mus musculus GN=Actn2 PE=1 SV=2                                                 | Actn2            | Q9JI91             | 104 kDa   | 100% (100%)   | 100% (100%)   |
| ACTS_MOUSE Actin, alpha skeletal muscle OS=Mus musculus GN=Acta1 PE=1 SV=1                                     | Acta1            | P68134             | 42 kDa    | 100% (100%)   | 95% (95%)     |
| ADT1_MOUSE ADP/ATP translocase 1 OS=Mus musculus GN=Slc25a4 PE=1 SV=4                                          | Slc25a4          | P48962             | 33 kDa    | 100% (100%)   | 100% (100%)   |
| ALBU_MOUSE Serum albumin OS=Mus musculus GN=Alb PE=1 SV=3                                                      | Alb              | P07724             | 69 kDa    | 100% (100%)   | 100% (100%)   |
| ANXA2_MOUSE Annexin A2 OS=Mus musculus GN=Anxa2 PE=1 SV=2                                                      | Anxa2            | P07356             | 39 kDa    |               | 100% (100%)   |
| AT1A1_MOUSE Sodium/potassium-transporting ATPase subunit alpha-1 OS=Mus musculus GN=Atp1a1 PE=1 SV=1           | Atp1a1           | Q8VDN2             | 113 kDa   | 100% (100%)   | 100% (100%)   |
| AT1B1_MOUSE Sodium/potassium-transporting ATPase subunit beta-1 OS=Mus musculus GN=Atp1b1 PE=1 SV=1            | Atp1b1           | P14094             | 35 kDa    | 84% (84%)     | 100% (100%)   |
| ATP5I_MOUSE ATP synthase subunit e, mitochondrial OS=Mus musculus GN=Atp5i PE=1 SV=2                           | Atp5i            | Q06185             | 8 kDa     | 91% (91%)     | 100% (100%)   |
| ATPA_MOUSE ATP synthase subunit alpha, mitochondrial OS=Mus musculus GN=Atp5a1 PE=1 SV=1                       | Atp5a1           | Q03265             | 60 kDa    | 100% (100%)   | 100% (100%)   |
| ATPB_MOUSE ATP synthase subunit beta, mitochondrial OS=Mus musculus GN=Atp5b PE=1 SV=2                         | Atp5b            | P56480             | 56 kDa    | 100% (100%)   | 100% (100%)   |

|                                                                                                                                |        |                |            |                |                |
|--------------------------------------------------------------------------------------------------------------------------------|--------|----------------|------------|----------------|----------------|
| ATPD_MOUSE ATP synthase subunit delta, mitochondrial OS=Mus musculus GN=Atp5d PE=1 SV=1                                        | Atp5d  | Q9D3D9         | 18<br>kDa  | 96% (96%)      | 100%<br>(100%) |
| ATPO_MOUSE ATP synthase subunit O, mitochondrial OS=Mus musculus GN=Atp5o PE=1 SV=1                                            | Atp5o  | Q9DB20         | 23<br>kDa  | 100%<br>(100%) | 100%<br>(100%) |
| B1ASQ2_MOUSE Apolipoprotein O OS=Mus musculus GN=Apoo PE=4 SV=1                                                                | Apoo   | B1ASQ2<br>(+1) | 23<br>kDa  | 38% (38%)      | 100%<br>(100%) |
| B1B0C7_MOUSE Basement membrane-specific heparan sulfate proteoglycan core protein OS=Mus musculus GN=Hspg2 PE=2 SV=1           | Hspg2  | B1B0C7<br>(+1) | 469<br>kDa | 49% (49%)      | 100%<br>(100%) |
| CALX_MOUSE Calnexin OS=Mus musculus GN=Canx PE=1 SV=1                                                                          | Canx   | P35564         | 67<br>kDa  |                | 100%<br>(100%) |
| CAV1_MOUSE Caveolin-1 OS=Mus musculus GN=Cav1 PE=1 SV=1                                                                        | Cav1   | P49817         | 21<br>kDa  | 100%<br>(100%) | 100%<br>(100%) |
| CD36_MOUSE Platelet glycoprotein 4 OS=Mus musculus GN=Cd36 PE=1 SV=2                                                           | Cd36   | Q08857         | 53<br>kDa  | 100%<br>(100%) | 100%<br>(100%) |
| CH60_MOUSE 60 kDa heat shock protein, mitochondrial OS=Mus musculus GN=Hspd1 PE=1 SV=1                                         | Hspd1  | P63038         | 61<br>kDa  |                | 100%<br>(100%) |
| CHCH3_MOUSE Coiled-coil-helix-coiled-coil-helix domain-containing protein 3, mitochondrial OS=Mus musculus GN=Chchd3 PE=1 SV=1 | Chchd3 | Q9CRB9         | 26<br>kDa  | 100%<br>(100%) | 100%<br>(100%) |
| CISY_MOUSE Citrate synthase, mitochondrial OS=Mus musculus GN=Cs PE=1 SV=1                                                     | Cs     | Q9CZU6         | 52<br>kDa  | 41% (41%)      | 100%<br>(100%) |
| CO1A1_MOUSE Collagen alpha-1(I) chain OS=Mus musculus GN=Col1a1 PE=1 SV=4                                                      | Col1a1 | P11087         | 138<br>kDa | 100%<br>(100%) | 100%<br>(100%) |
| CO1A2_MOUSE Collagen alpha-2(I) chain OS=Mus musculus GN=Col1a2 PE=2 SV=2                                                      | Col1a2 | Q01149         | 130<br>kDa | 100%<br>(100%) | 100%<br>(100%) |
| CO6A2_MOUSE Collagen alpha-2(VI) chain OS=Mus musculus GN=Col6a2 PE=2 SV=3                                                     | Col6a2 | Q02788         | 110<br>kDa | 100%<br>(100%) | 54% (54%)      |
| COX2_MOUSE Cytochrome c oxidase subunit 2 OS=Mus musculus GN=Mtco2 PE=1 SV=1                                                   | Mtco2  | P00405 (+1)    | 26<br>kDa  | 100%<br>(100%) | 100%<br>(100%) |
| COX41_MOUSE Cytochrome c oxidase subunit 4 isoform 1, mitochondrial OS=Mus musculus GN=Cox4i1 PE=1 SV=2                        | Cox4i1 | P19783         | 20<br>kDa  | 100%<br>(100%) | 100%<br>(100%) |

|                                                                                                                       |          |                |            |                |                |
|-----------------------------------------------------------------------------------------------------------------------|----------|----------------|------------|----------------|----------------|
| COX5A_MOUSE Cytochrome c oxidase subunit 5A, mitochondrial OS=Mus musculus GN=Cox5a PE=1 SV=2                         | Cox5a    | P12787         | 16<br>kDa  | 100%<br>(100%) | 100%<br>(100%) |
| CRYAB_MOUSE Alpha-crystallin B chain OS=Mus musculus GN=Cryab PE=1 SV=2                                               | Cryab    | P23927         | 20<br>kDa  | 100%<br>(100%) | 100%<br>(100%) |
| CX6B1_MOUSE Cytochrome c oxidase subunit 6B1 OS=Mus musculus GN=Cox6b1 PE=1 SV=2                                      | Cox6b1   | P56391         | 10<br>kDa  | 100%<br>(100%) | 95% (95%)      |
| CY1_MOUSE Cytochrome c1, heme protein, mitochondrial OS=Mus musculus GN=Cyc1 PE=1 SV=1                                | Cyc1     | Q9D0M3         | 35<br>kDa  | 100%<br>(100%) | 100%<br>(100%) |
| D3YYT0_MOUSE Cadherin-2 OS=Mus musculus GN=Cdh2 PE=2 SV=1                                                             | Cdh2     | D3YYT0<br>(+1) | 94<br>kDa  | 100%<br>(100%) | 100%<br>(100%) |
| DESM_MOUSE Desmin OS=Mus musculus GN=Des PE=1 SV=3                                                                    | Des      | P31001         | 53<br>kDa  | 100%<br>(100%) | 100%<br>(100%) |
| DHSA_MOUSE Succinate dehydrogenase [ubiquinone] flavoprotein subunit, mitochondrial OS=Mus musculus GN=Sdha PE=1 SV=1 | Sdha     | Q8K2B3         | 73<br>kDa  | 100%<br>(100%) | 100%<br>(100%) |
| DHSB_MOUSE Succinate dehydrogenase [ubiquinone] iron-sulfur subunit, mitochondrial OS=Mus musculus GN=Sdhb PE=1 SV=1  | Sdhb     | Q9CQA3         | 32<br>kDa  | 100%<br>(100%) | 100%<br>(100%) |
| DPEP1_MOUSE Dipeptidase 1 OS=Mus musculus GN=Dpep1 PE=1 SV=2                                                          | Dpep1    | P31428         | 46<br>kDa  | 39% (39%)      | 100%<br>(100%) |
| E9Q1X8_MOUSE Voltage-dependent calcium channel subunit alpha-2/delta-1 OS=Mus musculus GN=Cacna2d1 PE=2 SV=2          | Cacna2d1 | E9Q1X8<br>(+5) | 123<br>kDa | 100%<br>(100%) | 76% (76%)      |
| E9Q800_MOUSE Mitochondrial inner membrane protein OS=Mus musculus GN=Immt PE=2 SV=1                                   | Immt     | E9Q800         | 76<br>kDa  | 100%<br>(100%) | 100%<br>(100%) |
| ECHA_MOUSE Trifunctional enzyme subunit alpha, mitochondrial OS=Mus musculus GN=Hadha PE=1 SV=1                       | Hadha    | Q8BMS1         | 83<br>kDa  | 100%<br>(100%) | 100%<br>(100%) |
| ECHB_MOUSE Trifunctional enzyme subunit beta, mitochondrial OS=Mus musculus GN=Hadhb PE=1 SV=1                        | Hadhb    | Q99JY0         | 51<br>kDa  | 100%<br>(100%) | 100%<br>(100%) |
| F6QYE1_MOUSE Calsequestrin OS=Mus musculus GN=Casq2 PE=2 SV=1                                                         | Casq2    | F6QYE1<br>(+1) | 48<br>kDa  | 100%<br>(100%) | 100%<br>(100%) |
| F8VQJ3_MOUSE Laminin subunit gamma-1 OS=Mus musculus GN=Lamc1 PE=2 SV=1                                               | Lamc1    | F8VQJ3         | 177<br>kDa | 100%<br>(100%) | 100%<br>(100%) |

|                                                                                                                |          |                |           |                |                |
|----------------------------------------------------------------------------------------------------------------|----------|----------------|-----------|----------------|----------------|
| F8WHP8_MOUSE ATP synthase subunit f, mitochondrial OS=Mus musculus GN=Atp5j2 PE=2 SV=1                         | Atp5j2   | F8WHP8         | 9 kDa     | 100%<br>(100%) | 69% (69%)      |
| F8WIT2_MOUSE Annexin OS=Mus musculus GN=Anxa6 PE=2 SV=1                                                        | Anxa6    | F8WIT2<br>(+1) | 75<br>kDa | 100%<br>(100%) | 100%<br>(100%) |
| G3UX26_MOUSE Voltage-dependent anion-selective channel protein 2 (Fragment) OS=Mus musculus GN=Vdac2 PE=4 SV=1 | Vdac2    | G3UX26<br>(+1) | 30<br>kDa |                | 100%<br>(100%) |
| G3X8R0_MOUSE Receptor accessory protein 5, isoform CRA_a OS=Mus musculus GN=Reep5 PE=4 SV=1                    | Reep5    | G3X8R0         | 21<br>kDa | 57% (57%)      | 100%<br>(100%) |
| G3X9L6_MOUSE MCG55033 OS=Mus musculus GN=Gm10250 PE=4 SV=1                                                     | Gm10250  | G3X9L6<br>(+1) | 19<br>kDa | 100%<br>(100%) | 100%<br>(100%) |
| H14_MOUSE Histone H1.4 OS=Mus musculus GN=Hist1h1e PE=1 SV=2                                                   | Hist1h1e | P43274         | 22<br>kDa | 100%<br>(100%) | 100%<br>(100%) |
| HBB1_MOUSE Hemoglobin subunit beta-1 OS=Mus musculus GN=Hbb-b1 PE=1 SV=2                                       | Hbb-b1   | P02088         | 16<br>kDa | 100%<br>(100%) | 100%<br>(100%) |
| HSPB1_MOUSE Heat shock protein beta-1 OS=Mus musculus GN=Hspb1 PE=1 SV=3                                       | Hspb1    | P14602 (+1)    | 23<br>kDa | 100%<br>(100%) | 67% (67%)      |
| IDH3A_MOUSE Isocitrate dehydrogenase [NAD] subunit alpha, mitochondrial OS=Mus musculus GN=Idh3a PE=1 SV=1     | Idh3a    | Q9D6R2         | 40<br>kDa | 40% (40%)      | 100%<br>(100%) |
| ITB1_MOUSE Integrin beta-1 OS=Mus musculus GN=Itgb1 PE=1 SV=1                                                  | Itgb1    | P09055         | 88<br>kDa | 100%<br>(100%) | 100%<br>(100%) |
| J3QQ13_MOUSE Troponin T, cardiac muscle OS=Mus musculus GN=Tnnt2 PE=2 SV=1                                     | Tnnt2    | J3QQ13<br>(+7) | 36<br>kDa | 100%<br>(100%) | 100%<br>(100%) |
| K1C42_MOUSE Keratin, type I cytoskeletal 42 OS=Mus musculus GN=Krt42 PE=1 SV=1                                 | Krt42    | Q6IFX2         | 50<br>kDa | 100%<br>(100%) | 100%<br>(100%) |
| K22E_MOUSE Keratin, type II cytoskeletal 2 epidermal OS=Mus musculus GN=Krt2 PE=1 SV=1                         | Krt2     | Q3TTY5         | 71<br>kDa | 100%<br>(100%) | 100%<br>(100%) |
| K2C1_MOUSE Keratin, type II cytoskeletal 1 OS=Mus musculus GN=Krt1 PE=1 SV=4                                   | Krt1     | P04104         | 66<br>kDa | 100%<br>(100%) | 100%<br>(100%) |
| K2C5_MOUSE Keratin, type II cytoskeletal 5 OS=Mus musculus GN=Krt5 PE=1 SV=1                                   | Krt5     | Q922U2         | 62<br>kDa | 100%<br>(100%) | 100%<br>(100%) |
| K2C8_MOUSE Keratin, type II cytoskeletal 8 OS=Mus musculus GN=Krt8 PE=1 SV=4                                   | Krt8     | P11679         | 55<br>kDa | 96% (96%)      | 100%<br>(100%) |

|                                                                                                                  |        |             |         |             |             |
|------------------------------------------------------------------------------------------------------------------|--------|-------------|---------|-------------|-------------|
| K3W4Q8_MOUSE Basigin OS=Mus musculus GN=Bsg PE=4 SV=1                                                            | Bsg    | K3W4Q8 (+2) | 24 kDa  | 100% (100%) | 100% (100%) |
| KCRM_MOUSE Creatine kinase M-type OS=Mus musculus GN=Ckm PE=1 SV=1                                               | Ckm    | P07310      | 43 kDa  | 100% (100%) | 100% (100%) |
| KCRS_MOUSE Creatine kinase S-type, mitochondrial OS=Mus musculus GN=Ckmt2 PE=1 SV=1                              | Ckmt2  | Q6P8J7      | 47 kDa  | 100% (100%) | 100% (100%) |
| KRT85_MOUSE Keratin, type II cuticular Hb5 OS=Mus musculus GN=Krt85 PE=2 SV=2                                    | Krt85  | Q9Z2T6      | 56 kDa  | 100% (100%) |             |
| KT33B_MOUSE Keratin, type I cuticular Ha3-II OS=Mus musculus GN=Krt33b PE=2 SV=2                                 | Krt33b | Q61897      | 46 kDa  | 100% (100%) |             |
| LAMA2_MOUSE Laminin subunit alpha-2 OS=Mus musculus GN=Lama2 PE=1 SV=2                                           | Lama2  | Q60675      | 344 kDa | 100% (100%) |             |
| LAMB1_MOUSE Laminin subunit beta-1 OS=Mus musculus GN=Lamb1 PE=1 SV=3                                            | Lamb1  | P02469      | 197 kDa | 100% (100%) | 100% (100%) |
| LMNA_MOUSE Prelamin-A/C OS=Mus musculus GN=Lmna PE=1 SV=2                                                        | Lmna   | P48678 (+1) | 74 kDa  | 96% (96%)   | 100% (100%) |
| MLRV_MOUSE Myosin regulatory light chain 2, ventricular/cardiac muscle isoform OS=Mus musculus GN=Myl2 PE=1 SV=3 | Myl2   | P51667      | 19 kDa  | 100% (100%) | 100% (100%) |
| MYH6_MOUSE Myosin-6 OS=Mus musculus GN=Myh6 PE=1 SV=2                                                            | Myh6   | Q02566      | 224 kDa | 100% (100%) | 100% (100%) |
| MYH7_MOUSE Myosin-7 OS=Mus musculus GN=Myh7 PE=1 SV=1                                                            | Myh7   | Q91Z83      | 223 kDa | 100% (100%) | 100% (100%) |
| MYH9_MOUSE Myosin-9 OS=Mus musculus GN=Myh9 PE=1 SV=4                                                            | Myh9   | Q8VDD5      | 226 kDa | 100% (100%) | 100% (100%) |
| MYL3_MOUSE Myosin light chain 3 OS=Mus musculus GN=Myl3 PE=1 SV=4                                                | Myl3   | P09542      | 22 kDa  | 100% (100%) | 100% (100%) |
| MYOZ2_MOUSE Myozenin-2 OS=Mus musculus GN=Myoz2 PE=1 SV=1                                                        | Myoz2  | Q9JJW5      | 30 kDa  | 37% (37%)   | 100% (100%) |
| NDUA5_MOUSE NADH dehydrogenase [ubiquinone] 1 alpha subcomplex subunit 5 OS=Mus musculus GN=Ndufa5 PE=1 SV=3     | Ndufa5 | Q9CPP6      | 13 kDa  | 100% (100%) |             |



|                                                                                                                      |         |             |         |             |             |
|----------------------------------------------------------------------------------------------------------------------|---------|-------------|---------|-------------|-------------|
| NDUB7_MOUSE NADH dehydrogenase [ubiquinone] 1 beta subcomplex subunit 7 OS=Mus musculus GN=Ndufb7 PE=1 SV=3          | Ndufb7  | Q9CR61      | 16 kDa  | 74% (74%)   | 100% (100%) |
| NDUBA_MOUSE NADH dehydrogenase [ubiquinone] 1 beta subcomplex subunit 10 OS=Mus musculus GN=Ndufb10 PE=1 SV=3        | Ndufb10 | Q9DCS9      | 21 kDa  | 100% (100%) | 100% (100%) |
| NDUS1_MOUSE NADH-ubiquinone oxidoreductase 75 kDa subunit, mitochondrial OS=Mus musculus GN=Ndufs1 PE=1 SV=2         | Ndufs1  | Q91VD9      | 80 kDa  | 100% (100%) | 100% (100%) |
| NDUS8_MOUSE NADH dehydrogenase [ubiquinone] iron-sulfur protein 8, mitochondrial OS=Mus musculus GN=Ndufs8 PE=1 SV=1 | Ndufs8  | Q8K3J1      | 24 kDa  | 100% (100%) | 100% (100%) |
| NIPS2_MOUSE Protein NipSnap homolog 2 OS=Mus musculus GN=Gbas PE=2 SV=1                                              | Gbas    | O55126 (+1) | 33 kDa  |             | 100% (100%) |
| PGS2_MOUSE Decorin OS=Mus musculus GN=Dcn PE=2 SV=1                                                                  | Dcn     | P28654      | 40 kDa  | 100% (100%) | 100% (100%) |
| PHB_MOUSE Prohibitin OS=Mus musculus GN=Phb PE=1 SV=1                                                                | Phb     | P67778      | 30 kDa  | 100% (100%) | 100% (100%) |
| PTRF_MOUSE Polymerase I and transcript release factor OS=Mus musculus GN=Ptrf PE=1 SV=1                              | Ptrf    | O54724      | 44 kDa  | 100% (100%) | 100% (100%) |
| Q8R5L1_MOUSE Complement component 1 Q subcomponent-binding protein, mitochondrial OS=Mus musculus GN=C1qbp PE=2 SV=1 | C1qbp   | Q8R5L1      | 31 kDa  | 83% (83%)   | 100% (100%) |
| Q9CQB4_MOUSE Cytochrome b-c1 complex subunit 7 OS=Mus musculus GN=Uqcrb PE=3 SV=1                                    | Uqcrb   | Q9CQB4 (+1) | 14 kDa  | 100% (100%) | 100% (100%) |
| QCR1_MOUSE Cytochrome b-c1 complex subunit 1, mitochondrial OS=Mus musculus GN=Uqcrc1 PE=1 SV=2                      | Uqcrc1  | Q9CZ13      | 53 kDa  | 100% (100%) | 100% (100%) |
| QCR2_MOUSE Cytochrome b-c1 complex subunit 2, mitochondrial OS=Mus musculus GN=Uqcrc2 PE=1 SV=1                      | Uqcrc2  | Q9DB77      | 48 kDa  | 100% (100%) | 100% (100%) |
| SPTB2_MOUSE Spectrin beta chain, non-erythrocytic 1 OS=Mus musculus GN=Sptbn1 PE=1 SV=2                              | Sptbn1  | Q62261      | 274 kDa |             | 100% (100%) |
| TBB4B_MOUSE Tubulin beta-4B chain OS=Mus musculus GN=Tubb4b PE=1 SV=1                                                | Tubb4b  | P68372      | 50 kDa  | 100% (100%) |             |

|                                                                                                              |       |          |            |                |                |
|--------------------------------------------------------------------------------------------------------------|-------|----------|------------|----------------|----------------|
| THIM_MOUSE 3-ketoacyl-CoA thiolase, mitochondrial OS=Mus musculus GN=Acaa2 PE=1 SV=3                         | Acaa2 | Q8BWT1   | 42<br>kDa  | 86% (86%)      | 100%<br>(100%) |
| TNNC1_MOUSE Troponin C, slow skeletal and cardiac muscles OS=Mus musculus GN=Tnnc1 PE=2 SV=1                 | Tnnc1 | P19123   | 18<br>kDa  | 100%<br>(100%) | 100%<br>(100%) |
| TNNI3_MOUSE Troponin I, cardiac muscle OS=Mus musculus GN=Tnni3 PE=1 SV=2                                    | Tnni3 | P48787   | 24<br>kDa  | 100%<br>(100%) | 100%<br>(100%) |
| TPM1_MOUSE Tropomyosin alpha-1 chain OS=Mus musculus GN=Tpm1 PE=1 SV=1                                       | Tpm1  | P58771   | 33<br>kDa  | 100%<br>(100%) | 100%<br>(100%) |
| USMG5_MOUSE Up-regulated during skeletal muscle growth protein 5 OS=Mus musculus GN=Usmg5 PE=1 SV=1          | Usmg5 | Q78IK2   | 6 kDa      | 100%<br>(100%) | 100%<br>(100%) |
| VDAC1_MOUSE Isoform Mt-VDAC1 of Voltage-dependent anion-selective channel protein 1 OS=Mus musculus GN=Vdac1 | OS    | Q60932-2 | 31<br>kDa  | 100%<br>(100%) | 100%<br>(100%) |
| VIME_MOUSE Vimentin OS=Mus musculus GN=Vim PE=1 SV=3                                                         | Vim   | P20152   | 54<br>kDa  | 100%<br>(100%) | 100%<br>(100%) |
| VINC_MOUSE Vinculin OS=Mus musculus GN=Vcl PE=1 SV=4                                                         | Vcl   | Q64727   | 117<br>kDa | 100%<br>(100%) | 100%<br>(100%) |

Note: The percentage in the table indicates the identification probability of the specified protein.

## Supplemental Table S3

### Proteins in common

| mECM                         | nzECM                          | hzECM                          |
|------------------------------|--------------------------------|--------------------------------|
| Mouse gene (accession #, MW) | Zfish gene (accession #, MW)   | Zfish gene (accession #, MW)   |
| acadvl (P50544, 71 kDa)      | acadvl (A9JT52 (+2), 71 kDa)   | acadvl (A9JT52 (+2), 71 kDa)   |
| Aco2 (Q99KI0, 85 kDa)        | aco2 (Q6PEI6, 85 kDa)          | aco2 (Q6PEI6, 85 kDa)          |
| Actn2 (Q9JI91, 104 kDa)      | actn2 (Q2YDR5, 103 kDa)        | actn2 (Q2YDR5, 103 kDa)        |
| Anxa2 (P07356, 39 kDa)       |                                | <b>anxa2a (Q804G9, 38 kDa)</b> |
| Atp1a1 (Q8VDN2, 113 kDa)     | atp1a1 (Q9DGL6, 113 kDa)       | atp1a1 (Q9DGL6, 113 kDa)       |
| Atp1b1 (P14094, 35 kDa)      | atp1b1a (Q7ZVX2, 35 kDa)       | atp1b1a (Q7ZVX2, 35 kDa)       |
| Atp5a1 (Q03265, 60 kDa)      | atp5a1 (Q08BA1, 60 kDa)        | atp5a1 (Q08BA1, 60 kDa)        |
| Atp5b (P56480, 56 kDa)       | atp5b (A8WGC6, 55 kDa)         | atp5b (A8WGC6, 55 kDa)         |
| Atp5o (Q9DB20, 23 kDa)       | atp5o (Q6DRD1, 22 kDa)         | atp5o (Q6DRD1, 22 kDa)         |
| Ckmt2 (Q6P8J7, 47 kDa)       | ckmt2 (A8WG85 (+1), 46 kDa)    | ckmt2 (A8WG85 (+1), 46 kDa)    |
| Col1a1 (P11087, 138 kDa)     | col1a1b (F1QDL1 (+1), 137 kDa) | col1a1b (F1QDL1 (+1), 137 kDa) |
| Col1a2 (Q01149, 130 kDa)     | col1a2 (E9QCG6 (+1), 127 kDa)  | col1a2 (E9QCG6 (+1), 127 kDa)  |
| Cox5a (P12787, 16 kDa)       | cox5aa (Q4VBU7, 16 kDa)        | cox5aa (Q4VBU7, 16 kDa)        |
|                              | cox5ab (F1QJ99 (+1), 17 kDa)   | cox5ab (F1QJ99 (+1), 17 kDa)   |
| Cyc1 (Q9D0M3, 35 kDa)        | cyc1 (Q68EI6, 33 kDa)          | cyc1 (Q68EI6, 33 kDa)          |
| Des (P31001, 53 kDa)         | desma (F1R8W3, 56 kDa)         | desma (F1R8W3, 56 kDa)         |

|                             |                              |                              |
|-----------------------------|------------------------------|------------------------------|
| Hspb1 (P14602 (+1), 23 kDa) | hspb1 (A4VAK4 (+1), 22 kDa)  | hspb1 (A4VAK4 (+1), 22 kDa)  |
| Hspd1 (P63038, 61 kDa)      | hspd1 (Q803B0, 61 kDa)       | hspd1 (Q803B0, 61 kDa)       |
| Immt (E9Q800, 76 kDa)       | immt (Q6PFS4, 83 kDa)        | immt (Q6PFS4, 83 kDa)        |
| Itgb1 (P09055, 88 kDa)      | itgb1b (Q3YAA0, 88 kDa)      | itgb1b (Q3YAA0, 88 kDa)      |
| Krt8 (P11679, 55 kDa)       | krt8 (Q6NWF6, 58 kDa)        | krt8 (Q6NWF6, 58 kDa)        |
| Lamc1 (F8VQJ3, 177 kDa)     | lamc1 (Q1LVF0, 176 kDa)      | lamc1 (Q1LVF0, 176 kDa)      |
| Mtco2 (P00405 (+1), 26 kDa) | mt-co2 (Q9MIY7, 26 kDa)      | mt-co2 (Q9MIY7, 26 kDa)      |
| Myh6 (Q02566, 224 kDa)      | myh6 (B3DJP9, 223 kDa)       | myh6 (B3DJP9, 223 kDa)       |
| Myh7 (Q91Z83, 223 kDa)      | myl7 (Q801M3, 19 kDa)        | myl7 (Q801M3, 19 kDa)        |
| Myoz2 (Q9JJW5, 30 kDa)      | myoz2b (F1QBP1, 29 kDa)      | myoz2b (F1QBP1, 29 kDa)      |
| Ndufa5 (Q9CPP6, 13 kDa)     | ndufa5 (Q5BJA2, 13 kDa)      | ndufa5 (Q5BJA2, 13 kDa)      |
| Ndufs8 (Q8K3J1, 24 kDa)     | ndufs8a (Q6P0T0, 24 kDa)     | ndufs8a (Q6P0T0, 24 kDa)     |
| Sdha (Q8K2B3, 73 kDa)       | sdha (Q6TNQ9, 73 kDa)        | sdha (Q6TNQ9, 73 kDa)        |
| Tnnc1 (P19123, 18 kDa)      | tnnc1a (Q800V7, 18 kDa)      | tnnc1a (Q800V7, 18 kDa)      |
| Tnnt2 (J3QQ13 (+7), 36 kDa) | tnnt2a (Q7ZSY4 (+2), 34 kDa) | tnnt2a (Q7ZSY4 (+2), 34 kDa) |
| Uqcrb (Q9CQB4 (+1), 14 kDa) | uqcrb (Q4V BV1, 13 kDa)      | uqcrb (Q4V BV1, 13 kDa)      |
| Uqcrc1 (Q9CZ13, 53 kDa)     | uqcrc1 (Q6NSN3 (+1), 52 kDa) | uqcrc1 (Q6NSN3 (+1), 52 kDa) |
| Uqcrc2 (Q9DB77, 48 kDa)     | uqcrc2b (Q6IQ59, 48 kDa)     | uqcrc2b (Q6IQ59, 48 kDa)     |
| Vdac2 (G3UX26 (+1), 30 kDa) | vdac2 (Q4JHL7 (+1), 30 kDa)  | vdac2 (Q4JHL7 (+1), 30 kDa)  |
|                             |                              |                              |
|                             |                              |                              |
|                             |                              |                              |

|                                     |                                     |                                              |
|-------------------------------------|-------------------------------------|----------------------------------------------|
|                                     | <b>Note:</b>                        | Pink color = uncharacterized protein         |
|                                     |                                     | <b>Bold = protein detected only in hzECM</b> |
|                                     |                                     |                                              |
|                                     |                                     |                                              |
|                                     |                                     |                                              |
| <b>Proteins not in common</b>       |                                     |                                              |
| <b>mECM</b>                         | <b>nzECM</b>                        | <b>hzECM</b>                                 |
| <b>Mouse gene (accession #, MW)</b> | <b>Zfish gene (accession #, MW)</b> | <b>Zfish gene (accession #, MW)</b>          |
| Acaa2 (Q8BWT1, 42 kDa)              | actc1a (Q6IQR3, 42 kDa)             | actc1a (Q6IQR3, 42 kDa)                      |
| Acta1 (P68134, 42 kDa)              | actc1a (Q9PTR4, 42 kDa)             | actc1a (Q9PTR4, 42 kDa)                      |
| Alb (P07724, 69 kDa)                | atp2a2a (A9C3Q4 (+2), 115 kDa)      | atp2a2a (A9C3Q4 (+2), 115 kDa)               |
| Anxa6 (F8WIT2 (+1), 75 kDa)         | atp5h (Q6PC77, 18 kDa)              | atp5h (Q6PC77, 18 kDa)                       |
| Apoo (B1ASQ2 (+1), 23 kDa)          | atp5ib (A2ARG7, 8 kDa)              | atp5ib (A2ARG7, 8 kDa)                       |
| Atp5d (Q9D3D9, 18 kDa)              | ba2 (Q90485, 16 kDa)                | ba2 (Q90485, 16 kDa)                         |
| Atp5i (Q06185, 8 kDa)               | chchd6 (Q63ZW2, 28 kDa)             | chchd6 (Q63ZW2, 28 kDa)                      |
| Atp5j2 (F8WHP8, 9 kDa)              | chchd6b (F1RBH3 (+1), 26 kDa)       | chchd6b (F1RBH3 (+1), 26 kDa)                |
| Bsg (K3W4Q8 (+2), 24 kDa)           | cmlc1 (B0R0F7, 22 kDa)              | cmlc1 (B0R0F7, 22 kDa)                       |
| C1qbp (Q8R5L1, 31 kDa)              | cox6c (Q6ZM23, 8 kDa)               | cox6c (Q6ZM23, 8 kDa)                        |
| Cacna2d1 (E9Q1X8 (+5), 123 kDa)     | CR762436.4 (E7EZX1 (+4), 14 kDa)    | CR762436.4 (E7EZX1 (+4), 14 kDa)             |
| Canx (P35564, 67 kDa)               | CU302436.1 (E7F1L7, 292 kDa)        | CU302436.1 (E7F1L7, 292 kDa)                 |

|                               |                                          |                                           |
|-------------------------------|------------------------------------------|-------------------------------------------|
| Casq2 (F6QYE1 (+1), 48 kDa)   |                                          | <b>fga (E9QCD1, 50 kDa)</b>               |
| Cav1 (P49817, 21 kDa)         |                                          | <b>fgb (Q6NYE1, 54 kDa)</b>               |
| Cd36 (Q08857, 53 kDa)         |                                          | <b>fgg (Q7ZVG7, 49 kDa)</b>               |
| Cdh2 (D3YYT0 (+1), 94 kDa)    | fn1b (Q58XP5, 276 kDa)                   | fn1b (Q58XP5, 276 kDa)                    |
| Chchd3 (Q9CRB9, 26 kDa)       | hlf0 (Q6NYV3, 21 kDa)                    | hlf0 (Q6NYV3, 21 kDa)                     |
| Ckm (P07310, 43 kDa)          | hspa9 (Q7ZYY3, 74 kDa)                   | hspa9 (Q7ZYY3, 74 kDa)                    |
| Col6a2 (Q02788, 110 kDa)      | idh2 (Q7ZUP6, 50 kDa)                    | idh2 (Q7ZUP6, 50 kDa)                     |
| Cox4i1 (P19783, 20 kDa)       | lmnb2 (Q9W6T5, 66 kDa)                   | lmnb2 (Q9W6T5, 66 kDa)                    |
| Cox6b1 (P56391, 10 kDa)       | LOC402880 (F1R6I1 (+1), 20 kDa)          | LOC402880 (F1R6I1 (+1), 20 kDa)           |
| Cryab (P23927, 20 kDa)        | LOC564077 (E7FAV6, 57 kDa)               | LOC564077 (E7FAV6, 57 kDa)                |
| Cs (Q9CZU6, 52 kDa)           | lrrc15 (A8BBI6, 58 kDa)                  | lrrc15 (A8BBI6, 58 kDa)                   |
| Dcn (P28654, 40 kDa)          | mb (Q6VN46, 16 kDa)                      | mb (Q6VN46, 16 kDa)                       |
| Dpep1 (P31428, 46 kDa)        | mybpc3 (F1Q615, 144 kDa)                 | mybpc3 (F1Q615, 144 kDa)                  |
| Gbas (O55126 (+1), 33 kDa)    | myh11a (B3DFS9 (+1), 228 kDa)            | myh11a (B3DFS9 (+1), 228 kDa)             |
| Gm10250 (G3X9L6 (+1), 19 kDa) |                                          | <b>nppa (Q6VYM3, 12 kDa)</b>              |
| Hadha (Q8BMS1, 83 kDa)        | sh3bgr (Q6DEH8, 21 kDa)                  | sh3bgr (Q6DEH8, 21 kDa)                   |
| Hadhb (Q99JY0, 51 kDa)        | si:ch1073-329n19.2 (F1R3F7 (+1), 30 kDa) | si:ch1073-329n19.2 (F1R3F7 (+1), 30 kDa)  |
| Hbb-b1 (P02088, 16 kDa)       |                                          | <b>si:ch211-103n10.5 (B0R0K9, 19 kDa)</b> |
| Hist1h1e (P43274, 22 kDa)     | si:ch211-150d5.2 (F1QJK4, 196 kDa)       | si:ch211-150d5.2 (F1QJK4, 196 kDa)        |

|                              |                                  |                                        |
|------------------------------|----------------------------------|----------------------------------------|
| Hspg2 (B1B0C7 (+1), 469 kDa) | slc25a5 (Q8JHI0, 33 kDa)         | slc25a5 (Q8JHI0, 33 kDa)               |
| ldh3a (Q9D6R2, 40 kDa)       |                                  | <b>slmapa (Q1RLV5, 50 kDa)</b>         |
| Krt1 (P04104, 66 kDa)        | sorbs2a (F1Q9A0, 141 kDa)        | sorbs2a (F1Q9A0, 141 kDa)              |
| Krt10 (A2A513 (+3), 57 kDa)  | spna2 (F1R446, 285 kDa)          | spna2 (F1R446, 285 kDa)                |
| Krt2 (Q3TTY5, 71 kDa)        | tmod1 (E9QGR6, 40 kDa)           | tmod1 (E9QGR6, 40 kDa)                 |
| Krt33b (Q61897, 46 kDa)      | tnni1b (E7F5J9 (+2), 21 kDa)     | tnni1b (E7F5J9 (+2), 21 kDa)           |
| Krt42 (Q6IFX2, 50 kDa)       | tpm4a (F1QKG7, 33 kDa)           | tpm4a (F1QKG7, 33 kDa)                 |
| Krt5 (Q922U2, 62 kDa)        | tpm4a (Q7T3F0, 29 kDa)           | tpm4a (Q7T3F0, 29 kDa)                 |
| Krt85 (Q9Z2T6, 56 kDa)       | vdac3 (A8E5I7 (+2), 30 kDa)      | vdac3 (A8E5I7 (+2), 30 kDa)            |
| Lama2 (Q60675, 344 kDa)      | vmhcl (F1QSE1 (+1), 223 kDa)     | vmhcl (F1QSE1 (+1), 223 kDa)           |
| Lamb1 (P02469, 197 kDa)      | wu:fe37d09 (A3KPR4 (+2), 11 kDa) | wu:fe37d09 (A3KPR4 (+2), 11 kDa)       |
| Lmna (P48678 (+1), 74 kDa)   | ywhaba (Q5PRD0, 28 kDa)          | ywhaba (Q5PRD0, 28 kDa)                |
| Myh9 (Q8VDD5, 226 kDa)       | zgc:101560 (H9GYI1, 21 kDa)      | zgc:101560 (H9GYI1, 21 kDa)            |
| Myl2 (P51667, 19 kDa)        | zgc:112234 (F1QG64, 15 kDa)      | zgc:112234 (F1QG64, 15 kDa)            |
| Myl3 (P09542, 22 kDa)        | zgc:153629 (F1R8U0 (+1), 48 kDa) | zgc:153629 (F1R8U0 (+1), 48 kDa)       |
| Ndufb10 (Q9DCS9, 21 kDa)     | zgc:56085 (F1Q766, 47 kDa)       | zgc:56085 (F1Q766, 47 kDa)             |
| Ndufb7 (Q9CR61, 16 kDa)      |                                  | <b>zgc:92880 (Q6DGK4 (+1), 16 kDa)</b> |
| Ndufs1 (Q91VD9, 80 kDa)      |                                  |                                        |
| OS (Q60932-2, 31 kDa)        |                                  |                                        |
| Phb (P67778, 30 kDa)         |                                  |                                        |

|                               |              |                                              |
|-------------------------------|--------------|----------------------------------------------|
| Ptrf (O54724, 44 kDa)         | <b>Note:</b> | Pink color = uncharacterized protein         |
| Reep5 (G3X8R0, 21 kDa)        |              | <b>Bold = protein detected only in hzECM</b> |
| Sdhb (Q9CQA3, 32 kDa)         |              |                                              |
| Slc25a4 (P48962, 33 kDa)      |              |                                              |
| Sptan1 (A3KGU7 (+1), 285 kDa) |              |                                              |
| Sptbn1 (Q62261, 274 kDa)      |              |                                              |
| Tnni3 (P48787, 24 kDa)        |              |                                              |
| Tpm1 (P58771, 33 kDa)         |              |                                              |
| Tubb4b (P68372, 50 kDa)       |              |                                              |
| Usmg5 (Q78IK2, 6 kDa)         |              |                                              |
| Vcl (Q64727, 117 kDa)         |              |                                              |
| Vim (P20152, 54 kDa)          |              |                                              |
|                               |              |                                              |
|                               |              |                                              |



**Supplemental Table T4. Echocardiographic parameters of infarcted mouse hearts following ECM treatment**

**Fractional Area Change**

| Mean $\pm$ SD (%) | 0D               | 5D               | 2W               | 6W               |
|-------------------|------------------|------------------|------------------|------------------|
| hzECM             | 57.12 $\pm$ 3.53 | 54.35 $\pm$ 4.83 | 47.47 $\pm$ 4.74 | 45.29 $\pm$ 4.40 |
| nzECM             | 57.12 $\pm$ 3.53 | 43.80 $\pm$ 7.35 | 45.13 $\pm$ 5.67 | 37.88 $\pm$ 2.44 |
| mECM              | 57.12 $\pm$ 3.53 | 45.39 $\pm$ 3.21 | 36.13 $\pm$ 3.50 | 29.97 $\pm$ 2.77 |
| Saline            | 57.12 $\pm$ 3.53 | 40.05 $\pm$ 5.28 | 32.27 $\pm$ 4.43 | 25.23 $\pm$ 4.72 |

**Ejection Fraction**

| Mean $\pm$ SD (%) | 0D               | 5D               | 2W               | 6W               |
|-------------------|------------------|------------------|------------------|------------------|
| hzECM             | 72.36 $\pm$ 2.24 | 68.24 $\pm$ 3.84 | 62.75 $\pm$ 5.62 | 59.83 $\pm$ 4.58 |
| nzECM             | 72.36 $\pm$ 2.24 | 59.64 $\pm$ 5.87 | 60.33 $\pm$ 5.54 | 51.31 $\pm$ 2.39 |
| mECM              | 72.36 $\pm$ 2.24 | 60.32 $\pm$ 3.02 | 50.03 $\pm$ 3.14 | 43.61 $\pm$ 3.46 |
| Saline            | 72.36 $\pm$ 2.24 | 57.21 $\pm$ 4.88 | 45.57 $\pm$ 5.47 | 38.02 $\pm$ 4.56 |

**End-Diastolic Area**

| Mean $\pm$ SD (mm <sup>2</sup> ) | 0D              | 5D               | 2W               | 6W               |
|----------------------------------|-----------------|------------------|------------------|------------------|
| hzECM                            | 9.83 $\pm$ 1.08 | 11.89 $\pm$ 0.77 | 14.65 $\pm$ 1.90 | 17.08 $\pm$ 1.38 |
| nzECM                            | 9.83 $\pm$ 1.08 | 11.60 $\pm$ 1.04 | 13.72 $\pm$ 1.19 | 17.61 $\pm$ 1.80 |
| mECM                             | 9.83 $\pm$ 1.08 | 13.73 $\pm$ 1.21 | 16.65 $\pm$ 1.07 | 20.95 $\pm$ 1.20 |
| Saline                           | 9.83 $\pm$ 1.08 | 13.37 $\pm$ 1.77 | 16.88 $\pm$ 2.62 | 20.07 $\pm$ 4.36 |

**End-Systolic Area**

| Mean $\pm$ SD (mm <sup>2</sup> ) | 0D              | 5D              | 2W               | 6W               |
|----------------------------------|-----------------|-----------------|------------------|------------------|
| hzECM                            | 4.24 $\pm$ 0.79 | 5.41 $\pm$ 0.39 | 7.72 $\pm$ 1.41  | 9.33 $\pm$ 0.90  |
| nzECM                            | 4.24 $\pm$ 0.79 | 6.49 $\pm$ 0.76 | 7.51 $\pm$ 0.84  | 10.96 $\pm$ 1.40 |
| mECM                             | 4.24 $\pm$ 0.79 | 7.48 $\pm$ 0.55 | 10.64 $\pm$ 0.94 | 14.67 $\pm$ 1.03 |
| Saline                           | 4.24 $\pm$ 0.79 | 8.05 $\pm$ 1.52 | 11.48 $\pm$ 2.29 | 15.04 $\pm$ 3.62 |

**Supplemental Table T5.** Echocardiographic parameters of infarcted mouse hearts following ECM treatment and ErbB2 inhibitor administration

**Fractional Area Change**

| Mean $\pm$ SD (%) | 0D               | 5D               | 2W               | 6W               |
|-------------------|------------------|------------------|------------------|------------------|
| hzECM             | 57.12 $\pm$ 3.53 | 46.11 $\pm$ 4.21 | 38.16 $\pm$ 4.52 | 30.14 $\pm$ 4.55 |
| nzECM             | 57.12 $\pm$ 3.53 | 44.37 $\pm$ 5.24 | 36.46 $\pm$ 6.71 | 29.18 $\pm$ 4.38 |
| mECM              | 57.12 $\pm$ 3.53 | 42.37 $\pm$ 3.30 | 35.02 $\pm$ 3.47 | 27.45 $\pm$ 2.50 |
| Saline            | 57.12 $\pm$ 3.53 | 39.48 $\pm$ 4.76 | 31.87 $\pm$ 3.68 | 25.16 $\pm$ 4.91 |

**Ejection Fraction**

| Mean $\pm$ SD (%) | 0D               | 5D               | 2W               | 6W               |
|-------------------|------------------|------------------|------------------|------------------|
| hzECM             | 72.36 $\pm$ 2.24 | 60.44 $\pm$ 5.13 | 51.37 $\pm$ 5.95 | 43.49 $\pm$ 5.21 |
| nzECM             | 72.36 $\pm$ 2.24 | 58.51 $\pm$ 5.32 | 49.35 $\pm$ 4.98 | 41.29 $\pm$ 2.83 |
| mECM              | 72.36 $\pm$ 2.24 | 56.24 $\pm$ 2.11 | 47.63 $\pm$ 3.34 | 39.21 $\pm$ 3.44 |
| Saline            | 72.36 $\pm$ 2.24 | 53.37 $\pm$ 4.33 | 43.76 $\pm$ 4.12 | 37.22 $\pm$ 5.65 |

**End-Diastolic Area**

| Mean $\pm$ SD (mm <sup>2</sup> ) | 0D              | 5D               | 2W               | 6W               |
|----------------------------------|-----------------|------------------|------------------|------------------|
| hzECM                            | 9.83 $\pm$ 1.08 | 13.39 $\pm$ 0.84 | 16.35 $\pm$ 1.28 | 19.50 $\pm$ 1.43 |
| nzECM                            | 9.83 $\pm$ 1.08 | 13.99 $\pm$ 1.12 | 16.71 $\pm$ 1.41 | 19.91 $\pm$ 1.95 |
| mECM                             | 9.83 $\pm$ 1.08 | 14.72 $\pm$ 1.04 | 17.45 $\pm$ 1.50 | 21.05 $\pm$ 1.17 |
| Saline                           | 9.83 $\pm$ 1.08 | 14.38 $\pm$ 1.58 | 17.85 $\pm$ 1.92 | 21.96 $\pm$ 2.25 |

**End-Systolic Area**

| Mean $\pm$ SD (mm <sup>2</sup> ) | 0D              | 5D              | 2W               | 6W               |
|----------------------------------|-----------------|-----------------|------------------|------------------|
| hzECM                            | 4.24 $\pm$ 0.79 | 7.21 $\pm$ 0.43 | 10.11 $\pm$ 0.94 | 13.32 $\pm$ 1.10 |
| nzECM                            | 4.24 $\pm$ 0.79 | 7.78 $\pm$ 0.61 | 10.62 $\pm$ 1.41 | 13.96 $\pm$ 1.01 |
| mECM                             | 4.24 $\pm$ 0.79 | 8.49 $\pm$ 0.48 | 11.33 $\pm$ 0.53 | 15.27 $\pm$ 1.53 |
| Saline                           | 4.24 $\pm$ 0.79 | 9.13 $\pm$ 1.23 | 12.18 $\pm$ 1.72 | 15.93 $\pm$ 2.21 |
